# Supplementary material for: Single-cell RNA sequencing reveals the immune microenvironment and signaling networks in cystitis glandularis
Source: Front Immunol. 2023 Feb 6;14:1083598. doi: 10.3389/fimmu.2023.1083598 (PMC9940314; doi:10.3389/fimmu.2023.1083598)
Supplement: Supplementary file 10 [file Table_9.xlsx]

## Sheet: Sheet1
Table S9. Differentially expressed genes among myeloid cell subsets
Data:	Single-cell RNA sequencing data of cystitis glandularis and normal bladder mucosa
Analysis	Seurat 4.2.0
Statistical Test	Wilcoxon Rank Sum (deafult)
Parameters	FindAllMarkers();min.pct = 0.25, thresh.use = 0.25
Column	Description
gene	gene symbol
p_val	p value not adjusted for multiple test correction
avg_logFC	log fold-chage of the average expression between the two groups
pct.1	% of cells expressing a given gene in cluster being tested for
pct.2	% of cells expressing that gene in all other clusters tested against
p_val_adj	adjusted p value (after applying Bonferroni correction for multiple testing; uses all genes in the dataset)
pct.diff	(pct.1-pct.2)
Sheet Name	Sheet Info
Macrophage	differential gene list for Macrophage
Monocyte	differential gene list for Monocyte
decentric	differential gene list for Decentric

## Sheet: Macrophage
gene	p_val	avg_log2FC	pct.1	pct.2	p_val_adj	cluster	pct.diff
C1QA	9.64997e-65	3.81319	0.716	0.074	1.80184e-60	macrophage	0.642
C1QB	3.18689e-58	3.3986	0.676	0.071	5.95057e-54	macrophage	0.605
SELENOP	6.24465e-57	4.31218	0.627	0.042	1.166e-52	macrophage	0.585
C1QC	1.75085e-56	3.05689	0.649	0.048	3.26918e-52	macrophage	0.601
STAB1	1.40566e-39	3.28494	0.568	0.128	2.62465e-35	macrophage	0.44
RNASE1	1.59354e-38	4.54651	0.44	0.01	2.97547e-34	macrophage	0.43
DAB2	1.51105e-37	2.98961	0.52	0.083	2.82144e-33	macrophage	0.437
APOE	3.17538e-37	3.74702	0.45	0.026	5.92907e-33	macrophage	0.424
SLCO2B1	1.06161e-35	1.93679	0.41	0.006	1.98225e-31	macrophage	0.404
MAF	1.24897e-35	2.68022	0.525	0.109	2.33207e-31	macrophage	0.416
A2M	1.9289e-35	2.16622	0.552	0.122	3.60165e-31	macrophage	0.43
MRC1	2.80738e-33	2.62902	0.499	0.087	5.24194e-29	macrophage	0.412
MS4A4A	1.2327e-30	2.09771	0.399	0.032	2.3017e-26	macrophage	0.367
LGMN	1.23698e-29	2.77368	0.386	0.029	2.30968e-25	macrophage	0.357
FOLR2	7.38706e-29	2.44511	0.397	0.042	1.37931e-24	macrophage	0.355
NRP1	2.96413e-28	1.84384	0.365	0.022	5.53463e-24	macrophage	0.343
SLC40A1	1.39914e-27	2.45811	0.442	0.093	2.61247e-23	macrophage	0.349
IGF1	6.95827e-26	1.45426	0.359	0.032	1.29925e-21	macrophage	0.327
F13A1	1.40166e-25	2.75462	0.456	0.125	2.61718e-21	macrophage	0.331
CD81	3.72089e-25	1.73681	0.552	0.224	6.94764e-21	macrophage	0.328
LILRB5	4.44244e-25	1.6719	0.298	0.003	8.29492e-21	macrophage	0.295
HSPB1	4.47296e-25	2.11448	0.48	0.125	8.35192e-21	macrophage	0.355
MARCKS	2.80089e-24	1.57764	0.689	0.471	5.22982e-20	macrophage	0.218
CD163L1	4.85823e-23	1.62974	0.29	0.01	9.07129e-19	macrophage	0.28
PLTP	5.12606e-23	1.39777	0.276	0.003	9.57138e-19	macrophage	0.273
CD209	3.27262e-22	1.23919	0.273	0.006	6.11063e-18	macrophage	0.267
CD63	4.35703e-22	1.57902	0.7	0.587	8.13544e-18	macrophage	0.113
SPRED1	1.05308e-21	1.40229	0.319	0.035	1.96632e-17	macrophage	0.284
GPR34	3.00751e-21	1.49123	0.375	0.074	5.61563e-17	macrophage	0.301
VSIG4	7.08838e-21	1.27051	0.33	0.045	1.32354e-16	macrophage	0.285
LTC4S	7.6192e-21	1.3154	0.268	0.01	1.42266e-16	macrophage	0.258
APOC1	3.45421e-19	2.46947	0.284	0.029	6.4497e-15	macrophage	0.255
ITM2B	3.63275e-19	0.871419	0.828	0.878	6.78308e-15	macrophage	-0.05
RGL1	4.12926e-19	1.33811	0.268	0.022	7.71015e-15	macrophage	0.246
MSR1	1.52595e-18	1.28919	0.319	0.058	2.84926e-14	macrophage	0.261
WWP1	4.14315e-18	1.60219	0.346	0.087	7.73609e-14	macrophage	0.259
GATM	1.20467e-17	1.09557	0.263	0.026	2.24935e-13	macrophage	0.237
ID1	3.75827e-17	2.32983	0.349	0.093	7.01743e-13	macrophage	0.256
ARHGAP18	4.25281e-17	1.2736	0.389	0.122	7.94085e-13	macrophage	0.267
KRT19	4.30757e-17	2.60391	0.426	0.17	8.0431e-13	macrophage	0.256
PLD3	1.69432e-16	1.64649	0.475	0.234	3.16363e-12	macrophage	0.241
CTSL	1.96299e-16	1.3815	0.303	0.061	3.66529e-12	macrophage	0.242
KRT13	2.78231e-16	2.82681	0.362	0.115	5.19514e-12	macrophage	0.247
MT-ND5	8.92729e-16	0.871469	0.869	0.888	1.6669e-11	macrophage	-0.019
CLDN4	1.24969e-15	1.85071	0.324	0.083	2.33343e-11	macrophage	0.241
CSF1R	1.94524e-15	1.49479	0.515	0.314	3.63216e-11	macrophage	0.201
FUCA1	3.09561e-15	1.08599	0.306	0.074	5.78013e-11	macrophage	0.232
GNAS	4.69074e-15	0.883991	0.737	0.606	8.75855e-11	macrophage	0.131
HES1	2.00184e-14	1.95439	0.437	0.196	3.73784e-10	macrophage	0.241
MT-CYB	1.077e-13	0.78682	0.949	0.974	2.01097e-09	macrophage	-0.025
ADAM28	1.62225e-13	0.890664	0.29	0.074	3.02907e-09	macrophage	0.216
MT-ND4	4.70057e-13	0.673363	0.957	0.974	8.77691e-09	macrophage	-0.017
SNCG	5.30389e-13	2.06293	0.298	0.09	9.90342e-09	macrophage	0.208
S100P	5.31683e-13	2.3411	0.432	0.224	9.92758e-09	macrophage	0.208
ENG	5.95483e-13	0.972196	0.295	0.083	1.11189e-08	macrophage	0.212
LACC1	1.15578e-12	0.969755	0.273	0.071	2.15807e-08	macrophage	0.202
ADIRF	1.97029e-12	2.37762	0.402	0.202	3.67892e-08	macrophage	0.2
AGR2	2.03522e-12	1.97544	0.252	0.061	3.80016e-08	macrophage	0.191
CD9	5.27983e-12	1.461	0.303	0.099	9.8585e-08	macrophage	0.204
CYB5A	5.7655e-12	1.74281	0.268	0.077	1.07653e-07	macrophage	0.191
PSCA	6.19353e-12	1.93127	0.271	0.077	1.15646e-07	macrophage	0.194
NPC2	7.25765e-12	1.17206	0.678	0.718	1.35515e-07	macrophage	-0.04
FABP5	9.74637e-12	2.1289	0.354	0.154	1.81984e-07	macrophage	0.2
CD74	1.00483e-11	0.937285	0.831	0.907	1.87622e-07	macrophage	-0.076
ANKH	1.27698e-11	0.884887	0.273	0.074	2.38438e-07	macrophage	0.199
MT-ATP6	1.36153e-11	0.814351	0.965	0.987	2.54224e-07	macrophage	-0.022
PEBP1	1.40614e-11	1.15101	0.434	0.234	2.62555e-07	macrophage	0.2
ATP1B1	3.11133e-11	1.16736	0.279	0.087	5.80947e-07	macrophage	0.192
SPINK1	3.29161e-11	1.97712	0.257	0.074	6.14609e-07	macrophage	0.183
DHRS2	4.54676e-11	2.1194	0.365	0.173	8.48972e-07	macrophage	0.192
ELF3	5.66873e-11	1.82231	0.295	0.106	1.05847e-06	macrophage	0.189
SLC4A7	9.54021e-11	0.954323	0.306	0.112	1.78135e-06	macrophage	0.194
TCF4	1.06405e-10	1.12295	0.308	0.122	1.9868e-06	macrophage	0.186
FCHO2	1.2289e-10	0.891616	0.273	0.09	2.29461e-06	macrophage	0.183
MGAT4A	2.3753e-10	0.820596	0.257	0.08	4.43516e-06	macrophage	0.177
PRDX1	2.56839e-10	1.2317	0.574	0.471	4.79569e-06	macrophage	0.103
ABCA1	3.34776e-10	0.862047	0.3	0.119	6.25093e-06	macrophage	0.181
CD14	5.81258e-10	1.28322	0.627	0.583	1.08533e-05	macrophage	0.044
TUBA1B	1.18551e-09	1.21253	0.55	0.433	2.21359e-05	macrophage	0.117
HLA-DPA1	1.49476e-09	0.821919	0.74	0.737	2.79102e-05	macrophage	0.003
GSN	1.72697e-09	1.03488	0.442	0.272	3.22461e-05	macrophage	0.17
CTSC	2.36753e-09	1.60061	0.525	0.439	4.42065e-05	macrophage	0.086
FRMD4B	5.28555e-09	0.874007	0.34	0.163	9.86917e-05	macrophage	0.177
AP2A2	5.66738e-09	0.716076	0.265	0.099	0.000105821	macrophage	0.166
ADAP2	6.06312e-09	1.24324	0.461	0.317	0.000113211	macrophage	0.144
CD163	1.48259e-08	1.54581	0.491	0.388	0.000276829	macrophage	0.103
GADD45B	2.2283e-08	1.19787	0.617	0.532	0.000416068	macrophage	0.085
ITPR2	2.41945e-08	1.14056	0.394	0.247	0.00045176	macrophage	0.147
LPAR6	2.52271e-08	1.078	0.418	0.279	0.000471041	macrophage	0.139
GYPC	3.67261e-08	1.16723	0.308	0.157	0.00068575	macrophage	0.151
LAIR1	4.33569e-08	0.778571	0.346	0.186	0.000809559	macrophage	0.16
CST3	6.86318e-08	0.3424	0.871	0.913	0.00128149	macrophage	-0.042
TPT1	1.02199e-07	0.380642	0.987	0.971	0.00190827	macrophage	0.016
RPLP0	1.26811e-07	0.844643	0.834	0.804	0.00236781	macrophage	0.03
CHCHD10	1.88056e-07	1.08101	0.394	0.24	0.00351139	macrophage	0.154
TMEM176B	2.05243e-07	0.946318	0.41	0.256	0.0038323	macrophage	0.154
HIST1H4C	2.24141e-07	0.861876	0.351	0.199	0.00418515	macrophage	0.152
ARL6IP1	2.96647e-07	0.809291	0.365	0.212	0.00553899	macrophage	0.153
MS4A7	3.06546e-07	1.42039	0.536	0.5	0.00572383	macrophage	0.036
PCBD1	3.93121e-07	1.02067	0.265	0.125	0.00734035	macrophage	0.14
CALR	5.83265e-07	1.07292	0.453	0.337	0.0108907	macrophage	0.116
TMEM176A	7.27563e-07	0.816513	0.265	0.122	0.0135851	macrophage	0.143
EGR1	9.1956e-07	0.649605	0.649	0.535	0.01717	macrophage	0.114
ZFP36L1	1.00025e-06	0.804781	0.617	0.58	0.0186767	macrophage	0.037
NCF4	1.31071e-06	0.828409	0.442	0.327	0.0244736	macrophage	0.115
HLA-DPB1	1.47938e-06	0.491302	0.697	0.686	0.0276229	macrophage	0.011
CD84	2.23527e-06	0.969156	0.332	0.208	0.041737	macrophage	0.124
ARRDC3	3.08539e-06	0.740283	0.29	0.151	0.0576105	macrophage	0.139
LIPA	3.36653e-06	0.793908	0.273	0.141	0.0628598	macrophage	0.132
CCL4L2	3.80456e-06	0.80655	0.357	0.202	0.0710388	macrophage	0.155
TTYH3	8.45859e-06	0.888695	0.29	0.173	0.157939	macrophage	0.117
FCGRT	8.83254e-06	1.14557	0.59	0.651	0.164921	macrophage	-0.061
RGS1	1.02878e-05	0.895878	0.386	0.244	0.192094	macrophage	0.142
CTSB	1.80821e-05	0.935398	0.646	0.699	0.337629	macrophage	-0.053
RPL3	2.35434e-05	0.619122	0.898	0.913	0.439602	macrophage	-0.015
NUCKS1	3.05782e-05	0.858795	0.405	0.301	0.570957	macrophage	0.104
NINJ1	3.80707e-05	0.766264	0.391	0.288	0.710856	macrophage	0.103
RPS6	3.82848e-05	0.544	0.954	0.952	0.714854	macrophage	0.002
BMP2K	4.49512e-05	0.690846	0.26	0.147	0.839328	macrophage	0.113
PTMS	6.03001e-05	0.600489	0.295	0.167	1	macrophage	0.128
JUN	7.00158e-05	0.450484	0.786	0.753	1	macrophage	0.033
AAK1	7.29235e-05	0.62207	0.354	0.237	1	macrophage	0.117
CTNND1	7.76022e-05	0.82624	0.252	0.151	1	macrophage	0.101
RB1	0.000112212	0.728917	0.381	0.285	1	macrophage	0.096
MT-ND3	0.000195755	0.528173	0.925	0.962	1	macrophage	-0.037
PPDPF	0.000247132	1.35383	0.319	0.237	1	macrophage	0.082
DYNLL1	0.000247756	0.77781	0.576	0.574	1	macrophage	0.002
HLA-DRB1	0.000255626	0.307174	0.721	0.737	1	macrophage	-0.016
IER3	0.000276708	0.750222	0.651	0.667	1	macrophage	-0.016
MT-CO1	0.00027862	0.454129	0.952	0.974	1	macrophage	-0.022
C3AR1	0.000287199	0.487	0.311	0.205	1	macrophage	0.106
ARL4C	0.000302494	0.888272	0.378	0.282	1	macrophage	0.096
MT-CO2	0.000420371	0.480507	0.973	0.971	1	macrophage	0.002
NDUFB3	0.000440866	0.267873	0.201	0.356	1	macrophage	-0.155
MGST1	0.000442885	0.676124	0.169	0.33	1	macrophage	-0.161
ROMO1	0.00049855	0.257805	0.241	0.407	1	macrophage	-0.166
HLA-DMA	0.000513669	0.633032	0.55	0.545	1	macrophage	0.005
PDK4	0.000534816	1.43152	0.276	0.192	1	macrophage	0.084
MT-CO3	0.000543789	0.521064	0.944	0.981	1	macrophage	-0.037
HLA-DRA	0.00060982	0.435595	0.788	0.897	1	macrophage	-0.109
RPS4X	0.000970741	0.393753	0.914	0.891	1	macrophage	0.023
SPINT2	0.00108555	0.591809	0.3	0.208	1	macrophage	0.092
TTC3	0.00117113	0.704828	0.343	0.253	1	macrophage	0.09
RGS10	0.00127447	0.57996	0.469	0.429	1	macrophage	0.04
TXN	0.00131919	0.341492	0.343	0.548	1	macrophage	-0.205
AC103591.3	0.00133121	1.01196	0.292	0.215	1	macrophage	0.077
SCAMP2	0.00134361	0.644326	0.287	0.208	1	macrophage	0.079
HLA-DQA2	0.00157753	0.562883	0.284	0.196	1	macrophage	0.088
GAA	0.00167787	0.608613	0.292	0.215	1	macrophage	0.077
RPL35	0.00215951	0.346996	0.879	0.904	1	macrophage	-0.025
IK	0.00219088	0.262991	0.201	0.327	1	macrophage	-0.126
NDUFA11	0.00277711	0.254246	0.349	0.532	1	macrophage	-0.183
COX8A	0.00282558	0.302084	0.394	0.603	1	macrophage	-0.209
DSTN	0.00286445	1.31484	0.265	0.202	1	macrophage	0.063
HEXA	0.00290424	0.597708	0.346	0.282	1	macrophage	0.064
SNRPD3	0.00304674	0.318863	0.233	0.365	1	macrophage	-0.132
PPIA	0.00308168	0.509633	0.702	0.747	1	macrophage	-0.045
COX7A2	0.00316675	0.275725	0.37	0.577	1	macrophage	-0.207
ANXA2	0.00432857	0.340694	0.397	0.587	1	macrophage	-0.19
IL18	0.00441574	0.54854	0.295	0.224	1	macrophage	0.071
RPS18	0.00454654	0.26443	0.96	0.949	1	macrophage	0.011
IGHA1	0.00470582	0.435494	0.3	0.436	1	macrophage	-0.136
CYFIP1	0.00511481	0.686929	0.263	0.199	1	macrophage	0.064
FIS1	0.00527115	0.377822	0.239	0.359	1	macrophage	-0.12
TBCA	0.00598235	0.260133	0.365	0.532	1	macrophage	-0.167
MT-ND2	0.00602942	0.418829	0.906	0.939	1	macrophage	-0.033
GOLGA4	0.00608068	0.704724	0.346	0.285	1	macrophage	0.061
LDHB	0.00830875	0.849928	0.354	0.298	1	macrophage	0.056
HMOX1	0.00842626	0.623246	0.29	0.224	1	macrophage	0.066
CCL3	0.00846133	0.391112	0.477	0.388	1	macrophage	0.089
IER2	0.00903	0.32931	0.732	0.782	1	macrophage	-0.05

## Sheet: Monocyte
gene	p_val	avg_log2FC	pct.1	pct.2	p_val_adj	cluster	pct.diff
S100A8	6.83513e-111	4.18762	0.935	0.068	1.27626e-106	monocyte	0.867
FCN1	1.91404e-102	3.28356	0.878	0.052	3.5739e-98	monocyte	0.826
S100A9	2.57129e-100	4.31009	0.931	0.164	4.80111e-96	monocyte	0.767
VCAN	1.22748e-99	3.67485	0.866	0.055	2.29195e-95	monocyte	0.811
SLC11A1	7.68665e-95	2.61764	0.809	0.034	1.43525e-90	monocyte	0.775
S100A12	2.51199e-94	2.97617	0.776	0.014	4.69038e-90	monocyte	0.762
RIPOR2	1.84714e-79	2.21486	0.72	0.039	3.44898e-75	monocyte	0.681
MEGF9	1.32976e-73	2.04778	0.691	0.046	2.48292e-69	monocyte	0.645
MNDA	3.11174e-73	2.37727	0.923	0.351	5.81024e-69	monocyte	0.572
CSF3R	2.29845e-71	2.38059	0.862	0.2	4.29166e-67	monocyte	0.662
S100A4	4.21901e-66	2.38538	0.898	0.497	7.87773e-62	monocyte	0.401
CD55	6.18145e-66	2.21057	0.825	0.198	1.1542e-61	monocyte	0.627
CLEC4E	6.5925e-66	2.00734	0.663	0.057	1.23095e-61	monocyte	0.606
FPR1	2.01041e-65	1.88623	0.703	0.082	3.75384e-61	monocyte	0.621
FGR	3.10836e-65	1.58131	0.695	0.077	5.80393e-61	monocyte	0.618
LYZ	3.26326e-61	2.22432	0.915	0.649	6.09316e-57	monocyte	0.266
CD48	2.66128e-60	1.70659	0.797	0.18	4.96915e-56	monocyte	0.617
SERPINA1	3.25055e-60	1.82317	0.76	0.155	6.06944e-56	monocyte	0.605
SOD2	9.11331e-60	2.71894	0.862	0.305	1.70164e-55	monocyte	0.557
CTSS	1.84495e-59	1.85283	0.898	0.647	3.4449e-55	monocyte	0.251
SELL	8.24521e-59	1.6941	0.577	0.039	1.53955e-54	monocyte	0.538
NCF2	1.46309e-57	1.63766	0.809	0.226	2.73188e-53	monocyte	0.583
TKT	8.67709e-57	1.7158	0.882	0.36	1.62019e-52	monocyte	0.522
FLNA	4.76164e-56	1.56471	0.675	0.107	8.89094e-52	monocyte	0.568
CLEC12A	3.45073e-55	1.54952	0.602	0.059	6.4432e-51	monocyte	0.543
RILPL2	4.5613e-54	1.60299	0.715	0.155	8.51687e-50	monocyte	0.56
G0S2	2.79554e-53	2.80973	0.646	0.096	5.21984e-49	monocyte	0.55
CDA	7.5521e-53	1.14983	0.488	0.011	1.41013e-48	monocyte	0.477
RETN	7.83193e-53	2.11558	0.573	0.059	1.46238e-48	monocyte	0.514
LRRK2	1.59949e-52	2.01757	0.61	0.08	2.98656e-48	monocyte	0.53
APOBEC3A	3.40849e-52	1.66526	0.476	0.009	6.36434e-48	monocyte	0.467
RBP7	4.37103e-52	1.49163	0.561	0.046	8.16159e-48	monocyte	0.515
DUSP1	6.84719e-52	2.2438	0.907	0.645	1.27851e-47	monocyte	0.262
RGS2	1.00727e-51	1.9227	0.902	0.435	1.88077e-47	monocyte	0.467
STXBP2	5.2846e-51	1.61065	0.711	0.153	9.8674e-47	monocyte	0.558
CXCR4	1.05693e-50	2.33267	0.768	0.248	1.9735e-46	monocyte	0.52
AGTRAP	1.17345e-50	1.34617	0.593	0.073	2.19107e-46	monocyte	0.52
CSTA	1.86571e-50	1.53047	0.772	0.194	3.48365e-46	monocyte	0.578
CD52	1.94555e-50	1.79466	0.638	0.093	3.63273e-46	monocyte	0.545
NEAT1	4.35349e-49	1.928	1	0.715	8.12884e-45	monocyte	0.285
PLIN2	1.17078e-48	2.44237	0.715	0.2	2.18609e-44	monocyte	0.515
SRGN	7.8128e-48	1.5889	0.943	0.617	1.45881e-43	monocyte	0.326
AP1S2	1.59085e-47	1.55774	0.764	0.244	2.97044e-43	monocyte	0.52
PTPRC	2.65858e-47	1.51564	0.923	0.515	4.96411e-43	monocyte	0.408
CFP	2.80301e-47	1.08014	0.606	0.087	5.23379e-43	monocyte	0.519
IRAK3	3.61834e-47	1.48757	0.687	0.137	6.75616e-43	monocyte	0.55
VIM	5.03252e-47	1.50488	0.919	0.465	9.39673e-43	monocyte	0.454
GLIPR2	1.13943e-46	1.14935	0.541	0.055	2.12754e-42	monocyte	0.486
CDC42EP3	3.99686e-46	1.60099	0.557	0.075	7.46293e-42	monocyte	0.482
NAMPT	2.04574e-45	2.4854	0.854	0.435	3.8198e-41	monocyte	0.419
CD37	2.52272e-45	1.41206	0.764	0.267	4.71043e-41	monocyte	0.497
AC245128.3	8.44166e-45	1.37731	0.439	0.018	1.57623e-40	monocyte	0.421
SMCHD1	9.68319e-45	1.73322	0.683	0.171	1.80805e-40	monocyte	0.512
ASGR1	1.92466e-44	1.0574	0.455	0.025	3.59373e-40	monocyte	0.43
ABHD5	3.47513e-44	2.10639	0.577	0.091	6.48877e-40	monocyte	0.486
USP3	3.93132e-44	1.2512	0.577	0.091	7.34057e-40	monocyte	0.486
H3F3A	5.03534e-44	1.19535	0.931	0.777	9.40199e-40	monocyte	0.154
CD44	3.30352e-43	1.45903	0.789	0.273	6.16833e-39	monocyte	0.516
ICAM3	3.40175e-43	1.21466	0.472	0.039	6.35175e-39	monocyte	0.433
COTL1	4.2003e-43	1.39721	0.87	0.424	7.84281e-39	monocyte	0.446
USP15	1.18124e-42	1.48889	0.789	0.285	2.20561e-38	monocyte	0.504
C19orf38	1.96427e-42	1.05068	0.528	0.071	3.66769e-38	monocyte	0.457
POU2F2	1.67226e-41	1.43342	0.679	0.189	3.12244e-37	monocyte	0.49
RNF149	1.8943e-41	1.64981	0.732	0.241	3.53704e-37	monocyte	0.491
TYMP	2.05909e-41	1.32058	0.858	0.394	3.84473e-37	monocyte	0.464
IRS2	3.78882e-41	1.95486	0.707	0.255	7.07449e-37	monocyte	0.452
CD300E	1.47318e-40	1.12028	0.407	0.018	2.75072e-36	monocyte	0.389
VNN2	2.18483e-40	1.14127	0.398	0.016	4.07951e-36	monocyte	0.382
TNFAIP3	1.6103e-39	2.38409	0.736	0.301	3.00676e-35	monocyte	0.435
NUP214	2.61961e-39	1.142	0.687	0.196	4.89133e-35	monocyte	0.491
BST1	2.87729e-39	0.898716	0.382	0.011	5.37247e-35	monocyte	0.371
EVI2B	7.48933e-39	1.27584	0.85	0.38	1.39841e-34	monocyte	0.47
GMFG	1.00621e-38	1.1879	0.813	0.342	1.8788e-34	monocyte	0.471
LILRB3	3.21111e-38	1.30855	0.589	0.123	5.99579e-34	monocyte	0.466
C5AR1	9.57534e-38	1.71743	0.699	0.235	1.78791e-33	monocyte	0.464
SIRPB1	1.22943e-37	0.975327	0.398	0.023	2.2956e-33	monocyte	0.375
CPPED1	2.00877e-37	1.1455	0.533	0.1	3.75078e-33	monocyte	0.433
NCF1	2.20273e-37	1.45701	0.715	0.248	4.11294e-33	monocyte	0.467
PRKCB	2.76667e-37	1.07414	0.512	0.082	5.16593e-33	monocyte	0.43
ACSL1	3.2089e-37	1.56237	0.516	0.084	5.99166e-33	monocyte	0.432
NFIL3	5.94451e-37	1.46094	0.52	0.093	1.10996e-32	monocyte	0.427
TNFSF10	6.28677e-37	1.18368	0.602	0.139	1.17387e-32	monocyte	0.463
MXD1	9.90725e-37	1.65346	0.512	0.087	1.84988e-32	monocyte	0.425
BCL2A1	1.50577e-36	1.49185	0.646	0.171	2.81158e-32	monocyte	0.475
TALDO1	1.66212e-36	1.09267	0.793	0.289	3.1035e-32	monocyte	0.504
AZI2	1.69193e-36	0.958391	0.488	0.071	3.15916e-32	monocyte	0.417
IL17RA	2.20825e-36	1.07955	0.61	0.137	4.12325e-32	monocyte	0.473
TREM1	2.316e-36	1.35103	0.423	0.041	4.32444e-32	monocyte	0.382
NRGN	2.56453e-36	0.992855	0.341	0.007	4.78849e-32	monocyte	0.334
TSPO	2.99432e-36	1.19633	0.85	0.412	5.591e-32	monocyte	0.438
EREG	3.21778e-36	2.47781	0.358	0.014	6.00824e-32	monocyte	0.344
SH3BGRL3	4.30686e-36	1.21448	0.882	0.626	8.04178e-32	monocyte	0.256
ZNF281	4.56854e-36	1.66024	0.492	0.084	8.53039e-32	monocyte	0.408
CYTIP	5.80912e-36	1.30206	0.537	0.107	1.08468e-31	monocyte	0.43
TNFSF13B	7.46819e-36	1.14723	0.675	0.205	1.39446e-31	monocyte	0.47
LILRA5	1.33979e-35	0.929021	0.374	0.021	2.50166e-31	monocyte	0.353
SERPINB1	1.80765e-35	1.17286	0.736	0.257	3.37525e-31	monocyte	0.479
ZFAND5	3.03267e-35	1.67428	0.813	0.437	5.6626e-31	monocyte	0.376
CORO1A	3.20714e-35	1.1099	0.768	0.292	5.98837e-31	monocyte	0.476
MYO1G	3.22159e-35	0.884328	0.427	0.046	6.01535e-31	monocyte	0.381
AL034397.3	3.94173e-35	1.21965	0.37	0.021	7.36e-31	monocyte	0.349
MX2	7.52585e-35	1.38324	0.467	0.068	1.40523e-30	monocyte	0.399
SLA	1.42166e-34	1.32673	0.654	0.2	2.65452e-30	monocyte	0.454
CCDC69	1.46287e-34	0.947136	0.492	0.08	2.73147e-30	monocyte	0.412
PGD	2.04361e-34	0.979432	0.528	0.105	3.81582e-30	monocyte	0.423
LYST	2.05609e-34	1.47799	0.585	0.157	3.83913e-30	monocyte	0.428
BASP1	2.1346e-34	1.66929	0.622	0.175	3.98572e-30	monocyte	0.447
TMEM154	2.59049e-34	1.21309	0.459	0.062	4.83697e-30	monocyte	0.397
APLP2	2.88737e-34	1.16561	0.817	0.38	5.3913e-30	monocyte	0.437
METTL9	3.30503e-34	0.878419	0.618	0.162	6.17116e-30	monocyte	0.456
GLRX	5.05913e-34	0.867542	0.711	0.23	9.44642e-30	monocyte	0.481
SMIM25	5.16995e-34	0.989152	0.386	0.032	9.65333e-30	monocyte	0.354
FBXL5	6.87804e-34	1.17919	0.524	0.1	1.28427e-29	monocyte	0.424
RAB27A	7.47215e-34	0.921008	0.358	0.021	1.3952e-29	monocyte	0.337
RNF144B	9.18342e-34	1.40292	0.545	0.128	1.71473e-29	monocyte	0.417
EMP3	2.04554e-33	1.10732	0.748	0.308	3.81943e-29	monocyte	0.44
CYP1B1	2.14357e-33	1.3673	0.398	0.039	4.00247e-29	monocyte	0.359
LST1	4.53538e-33	1.22201	0.858	0.485	8.46847e-29	monocyte	0.373
MSRB1	2.85047e-32	1.01872	0.39	0.041	5.3224e-28	monocyte	0.349
VSIR	3.85087e-32	1.07411	0.752	0.298	7.19034e-28	monocyte	0.454
LCP1	4.75824e-32	1.09559	0.866	0.456	8.88458e-28	monocyte	0.41
PLEK	5.01711e-32	1.52939	0.789	0.371	9.36794e-28	monocyte	0.418
MYO1F	6.93734e-32	1.16079	0.768	0.319	1.29534e-27	monocyte	0.449
SSH2	8.93418e-32	1.3923	0.455	0.077	1.66819e-27	monocyte	0.378
PLAUR	1.23126e-31	1.57344	0.72	0.255	2.29901e-27	monocyte	0.465
GCA	3.1131e-31	1.24084	0.565	0.155	5.81278e-27	monocyte	0.41
MEFV	5.09718e-31	0.977957	0.35	0.027	9.51745e-27	monocyte	0.323
NHSL2	1.13818e-30	0.938598	0.28	0.002	2.12521e-26	monocyte	0.278
LSP1	1.2445e-30	0.801739	0.732	0.228	2.32373e-26	monocyte	0.504
TAGAP	1.2972e-30	1.11885	0.472	0.091	2.42213e-26	monocyte	0.381
CARD16	1.50412e-30	0.989562	0.683	0.246	2.80849e-26	monocyte	0.437
UBE2D1	5.67228e-30	1.01666	0.52	0.123	1.05913e-25	monocyte	0.397
SPATA13	7.16597e-30	0.980972	0.333	0.025	1.33803e-25	monocyte	0.308
IFITM2	7.74866e-30	1.18714	0.663	0.232	1.44683e-25	monocyte	0.431
AQP9	1.38803e-29	0.97174	0.28	0.005	2.59172e-25	monocyte	0.275
WARS	1.58667e-29	0.921112	0.476	0.093	2.96262e-25	monocyte	0.383
FYB1	2.28124e-29	1.03308	0.837	0.428	4.25954e-25	monocyte	0.409
SNX10	2.34664e-29	0.993091	0.488	0.105	4.38164e-25	monocyte	0.383
ADGRE5	2.88844e-29	1.0573	0.533	0.141	5.39329e-25	monocyte	0.392
HMGB2	3.5302e-29	0.872595	0.569	0.157	6.59158e-25	monocyte	0.412
LTA4H	4.20756e-29	0.925866	0.459	0.091	7.85635e-25	monocyte	0.368
TSC22D3	5.87353e-29	1.30439	0.76	0.355	1.0967e-24	monocyte	0.405
SMAP2	6.06736e-29	0.885485	0.764	0.319	1.1329e-24	monocyte	0.445
TNFRSF1B	6.96174e-29	1.09715	0.728	0.328	1.2999e-24	monocyte	0.4
RAC2	7.92824e-29	0.728202	0.581	0.162	1.48036e-24	monocyte	0.419
LRRFIP1	8.60802e-29	0.991506	0.825	0.424	1.60729e-24	monocyte	0.401
OAZ1	1.04754e-28	0.923191	0.89	0.67	1.95597e-24	monocyte	0.22
PTK2B	1.39075e-28	0.926063	0.455	0.087	2.59681e-24	monocyte	0.368
TXNIP	1.86381e-28	1.12257	0.898	0.59	3.4801e-24	monocyte	0.308
CKAP4	2.289e-28	0.914251	0.329	0.027	4.27401e-24	monocyte	0.302
FCAR	2.90809e-28	1.06032	0.289	0.011	5.42998e-24	monocyte	0.278
CD36	2.97332e-28	0.479651	0.74	0.251	5.55177e-24	monocyte	0.489
SLC7A7	3.08155e-28	0.873817	0.549	0.155	5.75387e-24	monocyte	0.394
PTPRE	3.0816e-28	1.29043	0.841	0.405	5.75397e-24	monocyte	0.436
KCNE1	3.4855e-28	1.32529	0.293	0.014	6.50812e-24	monocyte	0.279
FYN	4.07713e-28	0.752916	0.341	0.032	7.61282e-24	monocyte	0.309
HSD17B11	5.03298e-28	0.970232	0.561	0.164	9.39758e-24	monocyte	0.397
BTG1	6.2552e-28	1.12355	0.862	0.526	1.16797e-23	monocyte	0.336
ATP6V0D1	6.33584e-28	1.01314	0.61	0.212	1.18303e-23	monocyte	0.398
ELL2	6.33683e-28	1.25372	0.443	0.089	1.18321e-23	monocyte	0.354
AGTPBP1	9.13425e-28	1.02286	0.423	0.073	1.70555e-23	monocyte	0.35
LGALS1	1.24506e-27	0.912883	0.793	0.39	2.32477e-23	monocyte	0.403
HLA-B	1.86849e-27	0.702997	0.955	0.786	3.48884e-23	monocyte	0.169
KCNE3	1.94295e-27	0.955972	0.419	0.075	3.62787e-23	monocyte	0.344
SDCBP	2.02728e-27	0.964125	0.817	0.392	3.78534e-23	monocyte	0.425
FTH1	4.20233e-27	0.742905	0.996	0.984	7.84659e-23	monocyte	0.012
MCL1	5.83846e-27	1.12131	0.89	0.515	1.09016e-22	monocyte	0.375
ZBTB16	5.92819e-27	0.831827	0.289	0.016	1.10691e-22	monocyte	0.273
RAB11FIP1	7.56035e-27	1.04929	0.573	0.173	1.41167e-22	monocyte	0.4
CD93	8.54625e-27	1.02971	0.634	0.228	1.59576e-22	monocyte	0.406
CD300LF	9.50432e-27	0.82252	0.366	0.05	1.77465e-22	monocyte	0.316
LILRB2	2.19476e-26	0.961163	0.593	0.194	4.09806e-22	monocyte	0.399
ITGAL	3.36968e-26	0.897096	0.341	0.041	6.29186e-22	monocyte	0.3
PRAM1	8.26257e-26	0.837272	0.39	0.066	1.54279e-21	monocyte	0.324
RAB3D	9.8099e-26	0.611713	0.293	0.021	1.8317e-21	monocyte	0.272
DMXL2	1.1916e-25	0.884736	0.581	0.187	2.22495e-21	monocyte	0.394
FOXO3	1.27688e-25	1.08634	0.524	0.148	2.38419e-21	monocyte	0.376
SLC25A37	1.62468e-25	1.9032	0.443	0.103	3.03361e-21	monocyte	0.34
RTN3	1.67332e-25	0.910559	0.585	0.194	3.12443e-21	monocyte	0.391
HRH2	1.92358e-25	0.792709	0.402	0.073	3.59171e-21	monocyte	0.329
FAM200B	2.25279e-25	0.703197	0.431	0.087	4.20641e-21	monocyte	0.344
CRIP1	2.88692e-25	0.868924	0.358	0.052	5.39046e-21	monocyte	0.306
CCRL2	3.10874e-25	0.908361	0.301	0.027	5.80464e-21	monocyte	0.274
DOCK8	3.63304e-25	1.09717	0.638	0.262	6.78362e-21	monocyte	0.376
CPD	3.79397e-25	0.877708	0.313	0.032	7.0841e-21	monocyte	0.281
CASP1	4.38723e-25	0.820459	0.593	0.207	8.19184e-21	monocyte	0.386
LGALS2	4.62997e-25	0.877936	0.545	0.157	8.64509e-21	monocyte	0.388
GAS7	5.03338e-25	0.870176	0.472	0.118	9.39833e-21	monocyte	0.354
ZYX	5.18852e-25	0.840069	0.618	0.221	9.688e-21	monocyte	0.397
PSTPIP1	5.91256e-25	0.663401	0.39	0.066	1.10399e-20	monocyte	0.324
PHACTR1	6.98632e-25	1.70028	0.691	0.292	1.30449e-20	monocyte	0.399
PLP2	7.22079e-25	0.619401	0.48	0.118	1.34827e-20	monocyte	0.362
CRISPLD2	9.56915e-25	0.716277	0.289	0.023	1.78675e-20	monocyte	0.266
CAST	1.13726e-24	0.806525	0.752	0.374	2.12349e-20	monocyte	0.378
LIMD2	1.34337e-24	0.822674	0.569	0.196	2.50834e-20	monocyte	0.373
FAM45A	1.35996e-24	0.69974	0.435	0.091	2.53933e-20	monocyte	0.344
TES	1.79337e-24	0.872584	0.431	0.1	3.34859e-20	monocyte	0.331
SAMSN1	1.93247e-24	1.4691	0.606	0.251	3.60831e-20	monocyte	0.355
IFI30	2.35391e-24	1.12794	0.638	0.235	4.39521e-20	monocyte	0.403
IQGAP1	2.53312e-24	0.899827	0.813	0.403	4.72984e-20	monocyte	0.41
LILRA2	2.56593e-24	0.731851	0.37	0.064	4.7911e-20	monocyte	0.306
SPTLC2	4.62244e-24	0.821885	0.476	0.128	8.63101e-20	monocyte	0.348
GK	4.82037e-24	1.026	0.366	0.066	9.0006e-20	monocyte	0.3
PSMB9	5.70646e-24	0.759595	0.565	0.182	1.06551e-19	monocyte	0.383
FOS	6.11747e-24	1.3085	0.911	0.845	1.14225e-19	monocyte	0.066
ITGB2	6.40681e-24	0.865799	0.862	0.492	1.19628e-19	monocyte	0.37
FOSL2	9.03306e-24	1.00011	0.504	0.15	1.68665e-19	monocyte	0.354
TMEM170B	1.30884e-23	0.958675	0.35	0.057	2.44387e-19	monocyte	0.293
UBE2R2	1.37405e-23	0.787409	0.512	0.162	2.56563e-19	monocyte	0.35
SAT1	1.55382e-23	0.9592	0.996	0.733	2.90129e-19	monocyte	0.263
PDE4B	2.23181e-23	1.13414	0.451	0.121	4.16724e-19	monocyte	0.33
CAPN2	2.29144e-23	0.526443	0.362	0.057	4.27858e-19	monocyte	0.305
CD83	2.75357e-23	1.16384	0.679	0.312	5.14146e-19	monocyte	0.367
MYADM	3.21992e-23	1.05752	0.5	0.157	6.01224e-19	monocyte	0.343
MSN	3.284e-23	0.767057	0.679	0.292	6.13188e-19	monocyte	0.387
PECAM1	4.9329e-23	0.872432	0.541	0.18	9.21071e-19	monocyte	0.361
FMNL1	9.09826e-23	0.885854	0.533	0.173	1.69883e-18	monocyte	0.36
EVI2A	1.08911e-22	0.826121	0.606	0.228	2.03359e-18	monocyte	0.378
PABPC1	1.09504e-22	0.690178	0.931	0.786	2.04465e-18	monocyte	0.145
STK17B	1.12848e-22	1.02041	0.715	0.314	2.1071e-18	monocyte	0.401
ARHGAP26	1.27325e-22	1.06016	0.463	0.13	2.37742e-18	monocyte	0.333
KLF4	1.38282e-22	1.20927	0.703	0.339	2.58201e-18	monocyte	0.364
UPP1	1.45924e-22	0.702559	0.451	0.116	2.72468e-18	monocyte	0.335
IL1B	1.56843e-22	1.58783	0.663	0.292	2.92857e-18	monocyte	0.371
RXRA	1.63865e-22	0.785746	0.512	0.15	3.05969e-18	monocyte	0.362
CELF2	2.1769e-22	0.931983	0.675	0.296	4.06471e-18	monocyte	0.379
NLRP1	2.36335e-22	0.837617	0.37	0.073	4.41284e-18	monocyte	0.297
MAP4K4	2.50341e-22	1.07645	0.382	0.08	4.67436e-18	monocyte	0.302
XAF1	2.66143e-22	0.969917	0.492	0.146	4.96941e-18	monocyte	0.346
SULT1A1	3.04479e-22	0.718329	0.423	0.098	5.68523e-18	monocyte	0.325
BIN2	4.08931e-22	0.587523	0.52	0.153	7.63555e-18	monocyte	0.367
FKBP5	4.20607e-22	0.898968	0.61	0.232	7.85357e-18	monocyte	0.378
ATP2B1-AS1	4.8449e-22	1.2648	0.593	0.255	9.04639e-18	monocyte	0.338
PPIF	6.06934e-22	1.14933	0.419	0.112	1.13327e-17	monocyte	0.307
LAPTM5	7.44773e-22	0.750689	0.894	0.61	1.39064e-17	monocyte	0.284
HCAR2	8.91806e-22	0.793988	0.301	0.039	1.66518e-17	monocyte	0.262
TTC7A	1.61578e-21	0.630645	0.317	0.048	3.01699e-17	monocyte	0.269
CYBB	1.9399e-21	0.782448	0.809	0.46	3.62218e-17	monocyte	0.349
NACC2	2.07004e-21	0.69339	0.252	0.021	3.86518e-17	monocyte	0.231
NFAM1	2.47041e-21	0.750068	0.39	0.091	4.61275e-17	monocyte	0.299
EIF4E3	2.62714e-21	0.755304	0.268	0.027	4.9054e-17	monocyte	0.241
C1orf162	2.7082e-21	0.767572	0.72	0.339	5.05675e-17	monocyte	0.381
ISG15	2.72413e-21	1.07006	0.398	0.096	5.08649e-17	monocyte	0.302
ALDH1A1	4.44774e-21	0.677417	0.394	0.089	8.30483e-17	monocyte	0.305
GLIPR1	4.56593e-21	0.750781	0.748	0.369	8.52551e-17	monocyte	0.379
AHNAK	4.96224e-21	0.806843	0.78	0.394	9.2655e-17	monocyte	0.386
SLC24A4	5.45401e-21	0.663812	0.293	0.039	1.01837e-16	monocyte	0.254
TET2	7.0061e-21	0.908255	0.589	0.232	1.30818e-16	monocyte	0.357
LYN	7.53996e-21	0.788357	0.65	0.285	1.40786e-16	monocyte	0.365
S100A10	7.63836e-21	0.808717	0.813	0.458	1.42623e-16	monocyte	0.355
TRAF3IP3	1.05418e-20	0.794602	0.337	0.068	1.96836e-16	monocyte	0.269
GPCPD1	1.17222e-20	0.807727	0.549	0.198	2.18876e-16	monocyte	0.351
CCNY	1.2461e-20	0.56242	0.427	0.114	2.32671e-16	monocyte	0.313
RASSF3	1.61788e-20	0.640322	0.407	0.098	3.02091e-16	monocyte	0.309
DPYD	2.25395e-20	0.78475	0.492	0.155	4.20858e-16	monocyte	0.337
XRN2	2.31611e-20	0.652066	0.569	0.219	4.32463e-16	monocyte	0.35
PILRA	2.50666e-20	0.733343	0.516	0.173	4.68044e-16	monocyte	0.343
JAML	2.99105e-20	0.724184	0.752	0.369	5.5849e-16	monocyte	0.383
RIPK2	3.62682e-20	0.931636	0.341	0.073	6.772e-16	monocyte	0.268
S1PR4	4.12824e-20	0.53111	0.252	0.025	7.70825e-16	monocyte	0.227
LITAF	4.77533e-20	1.11789	0.707	0.358	8.9165e-16	monocyte	0.349
ATG2A	6.00569e-20	0.893468	0.252	0.027	1.12138e-15	monocyte	0.225
MTPN	6.15938e-20	0.667962	0.618	0.267	1.15008e-15	monocyte	0.351
SLC2A3	7.83186e-20	1.03527	0.537	0.189	1.46236e-15	monocyte	0.348
WSB1	8.91305e-20	0.985263	0.789	0.428	1.66424e-15	monocyte	0.361
SNAI1	9.34685e-20	0.731821	0.272	0.036	1.74524e-15	monocyte	0.236
NUMB	9.91217e-20	1.0041	0.48	0.166	1.8508e-15	monocyte	0.314
ATG3	1.30725e-19	0.860249	0.492	0.173	2.44089e-15	monocyte	0.319
NR4A2	1.41039e-19	1.31685	0.667	0.369	2.63348e-15	monocyte	0.298
NBPF19	1.5178e-19	0.568789	0.402	0.103	2.83403e-15	monocyte	0.299
CHD1	1.52315e-19	0.885352	0.537	0.203	2.84402e-15	monocyte	0.334
UBXN11	2.72887e-19	0.612656	0.285	0.043	5.09535e-15	monocyte	0.242
OSCAR	2.77083e-19	0.510234	0.26	0.032	5.1737e-15	monocyte	0.228
ZDHHC20	3.95715e-19	0.522046	0.337	0.068	7.38879e-15	monocyte	0.269
CREBRF	4.0798e-19	0.89118	0.476	0.162	7.6178e-15	monocyte	0.314
EMILIN2	4.24192e-19	0.719965	0.512	0.178	7.92052e-15	monocyte	0.334
ASAH1	4.44252e-19	0.767095	0.854	0.483	8.29508e-15	monocyte	0.371
LMO2	4.92622e-19	0.628138	0.411	0.116	9.19824e-15	monocyte	0.295
BNIP3L	6.62639e-19	1.09834	0.614	0.28	1.23728e-14	monocyte	0.334
ABTB1	7.20181e-19	0.692479	0.321	0.064	1.34472e-14	monocyte	0.257
SH3KBP1	7.51069e-19	0.666692	0.524	0.2	1.4024e-14	monocyte	0.324
STX11	8.64329e-19	0.680489	0.341	0.082	1.61388e-14	monocyte	0.259
S100A6	9.38139e-19	0.283089	0.951	0.768	1.75169e-14	monocyte	0.183
C9orf72	1.19978e-18	0.821331	0.439	0.137	2.24024e-14	monocyte	0.302
RASSF2	1.22194e-18	0.727171	0.427	0.132	2.2816e-14	monocyte	0.295
ITGAM	1.38547e-18	0.773016	0.435	0.137	2.58695e-14	monocyte	0.298
CSGALNACT2	1.60262e-18	0.753167	0.435	0.134	2.99242e-14	monocyte	0.301
SASH3	1.60297e-18	0.558586	0.293	0.05	2.99306e-14	monocyte	0.243
DAZAP2	1.61505e-18	0.738182	0.752	0.428	3.01563e-14	monocyte	0.324
MAP1LC3B	1.65897e-18	0.714131	0.634	0.294	3.09763e-14	monocyte	0.34
SP110	1.7574e-18	0.620222	0.496	0.169	3.28142e-14	monocyte	0.327
ANPEP	1.76487e-18	0.704449	0.329	0.071	3.29536e-14	monocyte	0.258
RBM3	1.8403e-18	0.637757	0.679	0.333	3.4362e-14	monocyte	0.346
PCBP1	2.33283e-18	0.653565	0.752	0.415	4.35586e-14	monocyte	0.337
BRI3	2.40274e-18	0.605537	0.805	0.469	4.48639e-14	monocyte	0.336
RHOB	3.63373e-18	1.10313	0.736	0.456	6.7849e-14	monocyte	0.28
FAM111A	3.6941e-18	0.709502	0.407	0.116	6.89762e-14	monocyte	0.291
SLC9A3R1	4.15589e-18	0.456156	0.285	0.048	7.75987e-14	monocyte	0.237
YWHAZ	5.31499e-18	0.739714	0.756	0.39	9.92415e-14	monocyte	0.366
YPEL5	6.12375e-18	0.942311	0.606	0.276	1.14343e-13	monocyte	0.33
RNF24	6.39789e-18	0.774523	0.272	0.043	1.19461e-13	monocyte	0.229
NOTCH2	6.87926e-18	0.779664	0.37	0.096	1.28449e-13	monocyte	0.274
CAP1	7.30832e-18	0.621151	0.772	0.415	1.36461e-13	monocyte	0.357
ARL4A	7.40635e-18	0.949096	0.431	0.141	1.38291e-13	monocyte	0.29
SULF2	9.65835e-18	0.787736	0.346	0.089	1.80341e-13	monocyte	0.257
GPSM3	1.16579e-17	0.754556	0.602	0.273	2.17676e-13	monocyte	0.329
STK10	1.24959e-17	0.644335	0.394	0.112	2.33324e-13	monocyte	0.282
BCL6	1.25316e-17	0.816058	0.386	0.107	2.3399e-13	monocyte	0.279
VASP	1.6122e-17	0.612997	0.638	0.278	3.01029e-13	monocyte	0.36
USP36	1.76211e-17	0.802768	0.407	0.123	3.2902e-13	monocyte	0.284
IL1RN	1.79419e-17	0.655991	0.321	0.068	3.35012e-13	monocyte	0.253
MAP3K2	1.88907e-17	0.958949	0.52	0.228	3.52727e-13	monocyte	0.292
GIMAP4	2.37592e-17	0.579671	0.565	0.232	4.43631e-13	monocyte	0.333
ADD3	2.70311e-17	0.644737	0.317	0.073	5.04726e-13	monocyte	0.244
NFKBIZ	3.33104e-17	1.28115	0.585	0.278	6.21972e-13	monocyte	0.307
CHST15	3.46227e-17	0.688615	0.293	0.057	6.46475e-13	monocyte	0.236
KLF13	4.24815e-17	0.60758	0.374	0.107	7.93214e-13	monocyte	0.267
TPM3	5.17061e-17	0.585399	0.833	0.517	9.65457e-13	monocyte	0.316
SAP30	5.41001e-17	0.615592	0.329	0.075	1.01016e-12	monocyte	0.254
HCST	5.80275e-17	0.522005	0.695	0.328	1.08349e-12	monocyte	0.367
PLBD1	6.01475e-17	0.69845	0.472	0.171	1.12307e-12	monocyte	0.301
CH25H	6.30844e-17	1.87729	0.28	0.057	1.17791e-12	monocyte	0.223
GRINA	9.38282e-17	0.584619	0.549	0.223	1.75196e-12	monocyte	0.326
NR4A3	9.81163e-17	1.08597	0.488	0.194	1.83203e-12	monocyte	0.294
SOCS3	1.28075e-16	0.597743	0.435	0.141	2.39142e-12	monocyte	0.294
ANXA1	1.40474e-16	0.633744	0.817	0.497	2.62294e-12	monocyte	0.32
PER1	1.42905e-16	0.730277	0.508	0.2	2.66833e-12	monocyte	0.308
DIAPH1	1.43645e-16	0.673228	0.354	0.098	2.68214e-12	monocyte	0.256
MDM2	1.50044e-16	0.788963	0.374	0.105	2.80163e-12	monocyte	0.269
DOK3	1.64899e-16	0.623644	0.285	0.057	3.07899e-12	monocyte	0.228
ATP6V1B2	1.70535e-16	0.754645	0.463	0.166	3.18422e-12	monocyte	0.297
G6PD	1.71497e-16	0.501715	0.276	0.052	3.2022e-12	monocyte	0.224
WAS	1.79337e-16	0.601713	0.589	0.26	3.34859e-12	monocyte	0.329
SLC36A4	1.92009e-16	0.740512	0.26	0.046	3.58519e-12	monocyte	0.214
EHD1	2.28555e-16	0.775871	0.285	0.059	4.26759e-12	monocyte	0.226
ZFP36L2	2.40073e-16	0.763238	0.833	0.508	4.48265e-12	monocyte	0.325
AOAH	2.65165e-16	0.635388	0.541	0.23	4.95115e-12	monocyte	0.311
SIPA1L1	2.80879e-16	0.712447	0.297	0.066	5.24458e-12	monocyte	0.231
HBEGF	2.84471e-16	0.842004	0.504	0.194	5.31163e-12	monocyte	0.31
MIS18BP1	3.11567e-16	0.766087	0.614	0.289	5.81759e-12	monocyte	0.325
KDM6B	3.18227e-16	0.779327	0.598	0.269	5.94193e-12	monocyte	0.329
MID1IP1	3.38395e-16	0.678946	0.325	0.08	6.3185e-12	monocyte	0.245
JAK2	3.65429e-16	0.706733	0.402	0.123	6.82329e-12	monocyte	0.279
MGAT1	3.67348e-16	0.763572	0.659	0.355	6.85912e-12	monocyte	0.304
SYAP1	4.14158e-16	1.00674	0.5	0.216	7.73315e-12	monocyte	0.284
CCND3	4.42903e-16	0.588456	0.354	0.1	8.26988e-12	monocyte	0.254
OSM	4.68909e-16	0.922152	0.26	0.048	8.75547e-12	monocyte	0.212
CLEC4A	5.24507e-16	0.53504	0.431	0.144	9.79359e-12	monocyte	0.287
PSMB8	5.28995e-16	0.386788	0.52	0.205	9.87739e-12	monocyte	0.315
STK38	5.39384e-16	0.504877	0.272	0.052	1.00714e-11	monocyte	0.22
PNRC1	5.83827e-16	0.778828	0.837	0.531	1.09012e-11	monocyte	0.306
VMP1	6.41701e-16	0.549155	0.74	0.387	1.19818e-11	monocyte	0.353
TUBA4A	7.1453e-16	0.383677	0.317	0.068	1.33417e-11	monocyte	0.249
KLHL8	7.21158e-16	0.668733	0.297	0.066	1.34655e-11	monocyte	0.231
DENND5A	7.51739e-16	0.533783	0.289	0.064	1.40365e-11	monocyte	0.225
SEMA4D	7.70888e-16	0.783908	0.354	0.098	1.4394e-11	monocyte	0.256
HECA	7.77348e-16	0.70888	0.386	0.121	1.45146e-11	monocyte	0.265
MAP3K3	7.8093e-16	0.683139	0.398	0.132	1.45815e-11	monocyte	0.266
KIAA0319L	7.95991e-16	0.631653	0.309	0.071	1.48627e-11	monocyte	0.238
ARPC1B	9.4726e-16	0.556507	0.833	0.533	1.76872e-11	monocyte	0.3
TLR2	1.03352e-15	0.750928	0.472	0.182	1.9298e-11	monocyte	0.29
ARL5B	1.28302e-15	0.972476	0.382	0.123	2.39566e-11	monocyte	0.259
SIK3	1.32044e-15	0.606295	0.268	0.052	2.46553e-11	monocyte	0.216
UBE2D3	1.3209e-15	0.753417	0.813	0.487	2.46638e-11	monocyte	0.326
ARHGEF40	1.34496e-15	0.790832	0.329	0.087	2.5113e-11	monocyte	0.242
CIR1	1.3886e-15	0.678545	0.394	0.13	2.59279e-11	monocyte	0.264
MFSD14B	1.41783e-15	0.555346	0.317	0.077	2.64738e-11	monocyte	0.24
THEMIS2	1.44502e-15	0.695858	0.528	0.226	2.69814e-11	monocyte	0.302
IGF2R	1.45246e-15	0.78101	0.325	0.084	2.71204e-11	monocyte	0.241
ACTN1	1.45278e-15	0.554977	0.447	0.159	2.71263e-11	monocyte	0.288
SELPLG	1.48902e-15	0.580428	0.354	0.098	2.78029e-11	monocyte	0.256
CXCL8	1.64881e-15	1.93364	0.577	0.31	3.07866e-11	monocyte	0.267
RIOK3	1.67853e-15	0.772498	0.447	0.162	3.13415e-11	monocyte	0.285
PSME1	1.73089e-15	0.453659	0.72	0.39	3.23193e-11	monocyte	0.33
ODF3B	1.75824e-15	0.638589	0.256	0.05	3.28298e-11	monocyte	0.206
NAPA	1.85019e-15	0.741507	0.39	0.128	3.45468e-11	monocyte	0.262
HSP90AA1	2.12607e-15	1.1204	0.927	0.831	3.96981e-11	monocyte	0.096
ELF1	2.43391e-15	0.554384	0.638	0.301	4.5446e-11	monocyte	0.337
RAP1B	2.61894e-15	0.56792	0.638	0.314	4.89009e-11	monocyte	0.324
PRKAG2	2.89506e-15	0.60939	0.398	0.134	5.40565e-11	monocyte	0.264
TNFAIP2	3.90472e-15	0.511816	0.748	0.385	7.29088e-11	monocyte	0.363
ARID1A	3.92211e-15	0.564849	0.492	0.194	7.32337e-11	monocyte	0.298
ZEB2	4.60888e-15	0.633634	0.793	0.437	8.60571e-11	monocyte	0.356
NADK	4.65936e-15	0.695801	0.317	0.082	8.69996e-11	monocyte	0.235
CDKN1B	4.67483e-15	0.667251	0.313	0.082	8.72884e-11	monocyte	0.231
GRK2	5.01594e-15	0.521197	0.557	0.244	9.36576e-11	monocyte	0.313
DNAJA1	5.48502e-15	0.730766	0.72	0.399	1.02416e-10	monocyte	0.321
CREB5	5.62713e-15	0.886255	0.285	0.066	1.0507e-10	monocyte	0.219
NLRP3	5.70027e-15	0.722236	0.439	0.173	1.06435e-10	monocyte	0.266
TBL1X	6.09603e-15	0.611831	0.301	0.073	1.13825e-10	monocyte	0.228
UBE2J1	6.47108e-15	0.614807	0.35	0.107	1.20828e-10	monocyte	0.243
CHMP1B	6.54581e-15	1.02854	0.533	0.246	1.22223e-10	monocyte	0.287
ATP1B3	8.10208e-15	1.21353	0.581	0.319	1.51282e-10	monocyte	0.262
PGK1	8.55552e-15	0.477464	0.634	0.314	1.59749e-10	monocyte	0.32
PPP1R15B	8.85198e-15	0.612886	0.443	0.162	1.65284e-10	monocyte	0.281
TYROBP	9.80065e-15	0.527853	0.911	0.702	1.82998e-10	monocyte	0.209
BACH1	9.89402e-15	0.794658	0.5	0.221	1.84741e-10	monocyte	0.279
CARS2	1.33758e-14	0.646376	0.297	0.075	2.49752e-10	monocyte	0.222
BIRC3	1.46398e-14	0.754289	0.35	0.105	2.73355e-10	monocyte	0.245
NUP58	1.48962e-14	0.492061	0.362	0.109	2.78142e-10	monocyte	0.253
SORL1	1.51204e-14	1.00117	0.476	0.18	2.82329e-10	monocyte	0.296
HCK	1.64487e-14	0.544535	0.512	0.216	3.07129e-10	monocyte	0.296
POLE4	1.71701e-14	0.358674	0.366	0.114	3.206e-10	monocyte	0.252
AKAP13	1.95064e-14	0.647435	0.752	0.412	3.64223e-10	monocyte	0.34
FRY	2.07611e-14	0.641989	0.26	0.057	3.87652e-10	monocyte	0.203
DDX60L	2.25725e-14	0.657503	0.293	0.073	4.21474e-10	monocyte	0.22
PYCARD	2.26448e-14	0.461413	0.72	0.39	4.22823e-10	monocyte	0.33
CD1D	2.41698e-14	0.505161	0.301	0.08	4.51298e-10	monocyte	0.221
HLA-F	2.50904e-14	0.525837	0.463	0.187	4.68488e-10	monocyte	0.276
NUDT16	2.53302e-14	0.470032	0.346	0.107	4.72965e-10	monocyte	0.239
ELOB	2.67651e-14	0.407353	0.768	0.44	4.99758e-10	monocyte	0.328
ROCK1	2.82342e-14	0.640798	0.659	0.344	5.27189e-10	monocyte	0.315
CALCOCO2	3.07493e-14	0.443342	0.423	0.15	5.74151e-10	monocyte	0.273
CASP4	3.11372e-14	0.652891	0.472	0.2	5.81394e-10	monocyte	0.272
JMY	3.39255e-14	0.636737	0.252	0.052	6.33457e-10	monocyte	0.2
TANK	3.54487e-14	0.443973	0.407	0.146	6.61897e-10	monocyte	0.261
HLA-C	4.92085e-14	0.591339	0.866	0.688	9.18821e-10	monocyte	0.178
LAMTOR4	6.46387e-14	0.522056	0.764	0.442	1.20693e-09	monocyte	0.322
MICU1	6.61404e-14	0.501993	0.252	0.055	1.23497e-09	monocyte	0.197
ZNF207	6.73782e-14	0.810264	0.533	0.253	1.25809e-09	monocyte	0.28
VAPA	7.20648e-14	0.503144	0.683	0.358	1.34559e-09	monocyte	0.325
JARID2	8.59562e-14	0.665466	0.382	0.137	1.60497e-09	monocyte	0.245
MBOAT7	9.76099e-14	0.484387	0.354	0.107	1.82257e-09	monocyte	0.247
PNPLA8	9.79261e-14	0.655401	0.374	0.125	1.82848e-09	monocyte	0.249
FXYD5	9.81176e-14	0.48391	0.679	0.358	1.83205e-09	monocyte	0.321
LY6E	1.13906e-13	0.591075	0.37	0.123	2.12686e-09	monocyte	0.247
GNAI2	1.22389e-13	0.502782	0.813	0.533	2.28525e-09	monocyte	0.28
ARHGAP30	1.23181e-13	0.613906	0.476	0.198	2.30003e-09	monocyte	0.278
TWISTNB	1.35346e-13	1.11701	0.264	0.066	2.52718e-09	monocyte	0.198
ATP5MPL	1.37072e-13	0.435261	0.654	0.349	2.55941e-09	monocyte	0.305
SERP1	1.52319e-13	0.451379	0.785	0.503	2.84411e-09	monocyte	0.282
FGD4	1.6994e-13	0.703895	0.386	0.139	3.17312e-09	monocyte	0.247
ZFYVE16	1.73507e-13	0.812525	0.533	0.248	3.23972e-09	monocyte	0.285
MAP3K1	1.80999e-13	0.573282	0.423	0.159	3.37961e-09	monocyte	0.264
MAP2K3	1.9112e-13	0.642163	0.382	0.134	3.56859e-09	monocyte	0.248
RAB5IF	2.04446e-13	0.377608	0.374	0.125	3.81742e-09	monocyte	0.249
FRAT2	2.08057e-13	0.503267	0.268	0.068	3.88483e-09	monocyte	0.2
SLCO3A1	2.2848e-13	0.593162	0.354	0.116	4.26618e-09	monocyte	0.238
SHKBP1	2.35906e-13	0.40036	0.341	0.109	4.40484e-09	monocyte	0.232
CAPNS1	2.37938e-13	0.288121	0.496	0.219	4.44279e-09	monocyte	0.277
MYD88	2.6672e-13	0.552667	0.337	0.107	4.9802e-09	monocyte	0.23
SEC22B	2.85609e-13	0.568489	0.394	0.141	5.33288e-09	monocyte	0.253
PHF21A	2.85942e-13	0.458085	0.272	0.068	5.33912e-09	monocyte	0.204
LRRC25	3.29679e-13	0.546283	0.407	0.155	6.15578e-09	monocyte	0.252
C16orf72	3.5386e-13	0.811076	0.447	0.185	6.60727e-09	monocyte	0.262
PKN2	3.59915e-13	0.672062	0.411	0.159	6.72034e-09	monocyte	0.252
IVNS1ABP	3.76608e-13	1.72507	0.5	0.232	7.03203e-09	monocyte	0.268
CRTAP	4.28259e-13	0.382389	0.52	0.237	7.99646e-09	monocyte	0.283
PYGL	4.32697e-13	0.397463	0.346	0.103	8.07933e-09	monocyte	0.243
MYH9	4.46318e-13	0.542951	0.585	0.287	8.33365e-09	monocyte	0.298
MSL3	4.9493e-13	0.517573	0.337	0.107	9.24133e-09	monocyte	0.23
CTNNB1	5.09806e-13	0.619232	0.516	0.237	9.51909e-09	monocyte	0.279
CLEC7A	5.17981e-13	0.403258	0.699	0.339	9.67174e-09	monocyte	0.36
FKBP1A	5.37626e-13	0.271187	0.654	0.323	1.00386e-08	monocyte	0.331
MPP1	5.68985e-13	0.354988	0.337	0.105	1.06241e-08	monocyte	0.232
ACAP2	5.76742e-13	0.604801	0.504	0.23	1.07689e-08	monocyte	0.274
RCSD1	5.85414e-13	0.424751	0.488	0.21	1.09308e-08	monocyte	0.278
CSNK1D	6.20669e-13	0.772741	0.402	0.157	1.15891e-08	monocyte	0.245
CAT	6.79012e-13	0.327945	0.488	0.212	1.26785e-08	monocyte	0.276
RAB1A	7.11733e-13	0.496303	0.427	0.169	1.32895e-08	monocyte	0.258
CEBPB	7.12011e-13	0.687015	0.691	0.405	1.32947e-08	monocyte	0.286
DNAJC7	7.57628e-13	0.603372	0.431	0.187	1.41464e-08	monocyte	0.244
CNIH4	7.87859e-13	0.313006	0.285	0.075	1.47109e-08	monocyte	0.21
CNPY3	8.5719e-13	0.525414	0.585	0.303	1.60054e-08	monocyte	0.282
TLR4	8.81716e-13	0.460352	0.504	0.219	1.64634e-08	monocyte	0.285
VAMP5	9.00597e-13	0.404462	0.402	0.146	1.68159e-08	monocyte	0.256
RHOA	9.09002e-13	0.491816	0.772	0.481	1.69729e-08	monocyte	0.291
VPS37B	9.44718e-13	0.676974	0.285	0.08	1.76398e-08	monocyte	0.205
DDX17	9.6948e-13	0.594842	0.772	0.446	1.81021e-08	monocyte	0.326
FAM120A	1.00029e-12	0.457083	0.541	0.257	1.86775e-08	monocyte	0.284
CUX1	1.05715e-12	0.546746	0.386	0.139	1.97391e-08	monocyte	0.247
SQOR	1.08805e-12	0.355517	0.346	0.114	2.03162e-08	monocyte	0.232
PRKACA	1.35405e-12	0.510846	0.35	0.116	2.52828e-08	monocyte	0.234
SP3	1.53436e-12	0.502323	0.402	0.153	2.86495e-08	monocyte	0.249
GSTK1	1.69732e-12	0.339872	0.585	0.278	3.16924e-08	monocyte	0.307
FES	1.73664e-12	0.518394	0.358	0.125	3.24265e-08	monocyte	0.233
GNAI3	1.96953e-12	0.743162	0.467	0.205	3.6775e-08	monocyte	0.262
MYCBP2	2.07661e-12	0.556542	0.541	0.262	3.87744e-08	monocyte	0.279
STAT1	2.45125e-12	0.565307	0.467	0.2	4.57698e-08	monocyte	0.267
ANKRD44	2.70761e-12	0.845234	0.427	0.185	5.05565e-08	monocyte	0.242
STX10	2.77074e-12	0.359262	0.301	0.091	5.17352e-08	monocyte	0.21
CCNI	2.79662e-12	0.507195	0.724	0.442	5.22186e-08	monocyte	0.282
KYNU	2.82741e-12	0.611993	0.309	0.096	5.27933e-08	monocyte	0.213
DICER1	2.85819e-12	0.431329	0.431	0.173	5.33681e-08	monocyte	0.258
RNF213	3.07891e-12	0.594306	0.65	0.355	5.74894e-08	monocyte	0.295
RAB31	3.18593e-12	0.398383	0.561	0.269	5.94876e-08	monocyte	0.292
ADSS	3.41822e-12	0.331875	0.252	0.062	6.38249e-08	monocyte	0.19
CSK	3.83829e-12	0.506971	0.419	0.173	7.16686e-08	monocyte	0.246
LIMS1	3.88052e-12	0.631057	0.557	0.271	7.24571e-08	monocyte	0.286
PFKFB3	4.27421e-12	0.924645	0.346	0.132	7.9808e-08	monocyte	0.214
PSMB8-AS1	4.61283e-12	0.456077	0.272	0.077	8.61307e-08	monocyte	0.195
IRF1	4.7711e-12	0.629471	0.549	0.269	8.9086e-08	monocyte	0.28
EIF3L	5.06629e-12	0.399583	0.65	0.353	9.45978e-08	monocyte	0.297
MYLIP	5.17955e-12	0.919226	0.337	0.123	9.67126e-08	monocyte	0.214
ZFAS1	5.27867e-12	0.411097	0.736	0.435	9.85634e-08	monocyte	0.301
PFDN5	5.44126e-12	0.473881	0.858	0.733	1.01599e-07	monocyte	0.125
ADGRE2	5.66004e-12	0.61367	0.317	0.105	1.05684e-07	monocyte	0.212
ACTB	5.96641e-12	0.303997	0.943	0.895	1.11405e-07	monocyte	0.048
JOSD1	6.08113e-12	0.691811	0.354	0.13	1.13547e-07	monocyte	0.224
ANKRD13D	6.28663e-12	0.769132	0.305	0.1	1.17384e-07	monocyte	0.205
STAT2	6.31529e-12	0.585614	0.451	0.191	1.17919e-07	monocyte	0.26
FAM198B	6.58963e-12	0.416508	0.411	0.159	1.23042e-07	monocyte	0.252
CCNL1	7.35673e-12	0.894073	0.813	0.492	1.37365e-07	monocyte	0.321
CYB5R4	7.83266e-12	0.533793	0.276	0.08	1.46251e-07	monocyte	0.196
OSER1	7.97591e-12	0.371835	0.285	0.087	1.48926e-07	monocyte	0.198
SUPT4H1	8.07813e-12	0.483971	0.402	0.164	1.50835e-07	monocyte	0.238
RAB20	8.46982e-12	0.674455	0.301	0.1	1.58148e-07	monocyte	0.201
COL4A3BP	9.14807e-12	0.435565	0.346	0.123	1.70813e-07	monocyte	0.223
STMP1	9.25863e-12	0.282903	0.443	0.189	1.72877e-07	monocyte	0.254
PICALM	9.79635e-12	0.543115	0.541	0.273	1.82917e-07	monocyte	0.268
DNAJB1	1.02954e-11	1.03291	0.593	0.339	1.92236e-07	monocyte	0.254
FRG1	1.06398e-11	0.311791	0.329	0.116	1.98666e-07	monocyte	0.213
VCL	1.0871e-11	0.305731	0.272	0.075	2.02983e-07	monocyte	0.197
PELI1	1.23251e-11	0.662697	0.358	0.134	2.30134e-07	monocyte	0.224
ARPC4	1.24815e-11	0.38189	0.618	0.344	2.33055e-07	monocyte	0.274
ALDH2	1.31706e-11	0.472327	0.549	0.289	2.45921e-07	monocyte	0.26
FNDC3B	1.38382e-11	0.468512	0.325	0.107	2.58388e-07	monocyte	0.218
AZIN1	1.49082e-11	0.55697	0.386	0.153	2.78366e-07	monocyte	0.233
RIT1	1.50801e-11	0.479071	0.28	0.084	2.81576e-07	monocyte	0.196
CHP1	1.55381e-11	0.366523	0.358	0.132	2.90127e-07	monocyte	0.226
WAC	1.83862e-11	0.517215	0.516	0.255	3.43307e-07	monocyte	0.261
APAF1	1.90122e-11	0.63937	0.297	0.093	3.54995e-07	monocyte	0.204
SLTM	1.97435e-11	0.343106	0.459	0.205	3.68651e-07	monocyte	0.254
HIPK3	2.32823e-11	0.467255	0.402	0.169	4.34727e-07	monocyte	0.233
TMSB10	2.42759e-11	0.370786	0.951	0.877	4.5328e-07	monocyte	0.074
UBE2B	2.44983e-11	0.607815	0.496	0.244	4.57432e-07	monocyte	0.252
DOCK2	2.53396e-11	0.408307	0.541	0.269	4.7314e-07	monocyte	0.272
RGS18	2.54273e-11	0.876681	0.398	0.171	4.74779e-07	monocyte	0.227
CNBP	2.59238e-11	0.298573	0.638	0.342	4.84049e-07	monocyte	0.296
GDI2	3.23561e-11	0.356408	0.65	0.358	6.04153e-07	monocyte	0.292
TCIRG1	3.39265e-11	0.369646	0.402	0.173	6.33475e-07	monocyte	0.229
PGLS	3.44774e-11	0.365001	0.589	0.303	6.43762e-07	monocyte	0.286
MANBA	3.46739e-11	0.5018	0.37	0.146	6.47431e-07	monocyte	0.224
MAPK14	3.65782e-11	0.706702	0.26	0.077	6.82988e-07	monocyte	0.183
SCPEP1	3.93089e-11	0.436149	0.463	0.21	7.33975e-07	monocyte	0.253
CDC42SE1	4.18012e-11	0.478239	0.427	0.189	7.80513e-07	monocyte	0.238
DCTN3	4.58362e-11	0.374394	0.317	0.114	8.55854e-07	monocyte	0.203
CYTH1	4.91945e-11	0.550634	0.325	0.118	9.1856e-07	monocyte	0.207
MPEG1	5.27025e-11	0.416933	0.768	0.456	9.8406e-07	monocyte	0.312
CLK1	5.28633e-11	0.71196	0.476	0.237	9.87064e-07	monocyte	0.239
RYBP	5.37141e-11	0.583627	0.28	0.093	1.00295e-06	monocyte	0.187
TLR8	5.54406e-11	0.48429	0.268	0.082	1.03519e-06	monocyte	0.186
NFE2L2	5.67591e-11	0.510921	0.65	0.378	1.05981e-06	monocyte	0.272
GLTP	5.81537e-11	0.251073	0.341	0.118	1.08585e-06	monocyte	0.223
NELFE	6.15739e-11	0.367327	0.272	0.084	1.14971e-06	monocyte	0.188
CSF2RB	6.59978e-11	0.374426	0.297	0.1	1.23231e-06	monocyte	0.197
PHF20L1	7.15484e-11	0.984043	0.427	0.196	1.33595e-06	monocyte	0.231
ZNF385A	7.18453e-11	0.349733	0.411	0.182	1.34149e-06	monocyte	0.229
NIN	7.55876e-11	0.56539	0.419	0.191	1.41137e-06	monocyte	0.228
PTPN12	8.03979e-11	0.471283	0.419	0.182	1.50119e-06	monocyte	0.237
SCAND1	8.9533e-11	0.349651	0.439	0.198	1.67176e-06	monocyte	0.241
PSEN1	9.9649e-11	0.535307	0.297	0.1	1.86065e-06	monocyte	0.197
SLC43A2	1.06495e-10	0.578787	0.398	0.166	1.98848e-06	monocyte	0.232
ANP32B	1.17399e-10	0.263907	0.598	0.31	2.19208e-06	monocyte	0.288
ATG16L2	1.22272e-10	0.720911	0.398	0.175	2.28306e-06	monocyte	0.223
NFKB1	1.31802e-10	0.528315	0.366	0.146	2.46101e-06	monocyte	0.22
WASHC2C	1.41262e-10	0.529644	0.293	0.1	2.63764e-06	monocyte	0.193
FLOT2	1.44344e-10	0.437923	0.256	0.077	2.69519e-06	monocyte	0.179
SETX	1.50176e-10	0.440654	0.553	0.278	2.80409e-06	monocyte	0.275
TSPAN14	1.50207e-10	0.313389	0.374	0.148	2.80466e-06	monocyte	0.226
JDP2	1.58432e-10	0.308275	0.337	0.121	2.95824e-06	monocyte	0.216
EIF3A	1.65658e-10	0.475929	0.65	0.383	3.09316e-06	monocyte	0.267
GNB2	1.71995e-10	0.304017	0.541	0.273	3.21148e-06	monocyte	0.268
LILRB1	1.75559e-10	0.459469	0.39	0.169	3.27803e-06	monocyte	0.221
SUN2	1.77788e-10	0.427713	0.293	0.103	3.31966e-06	monocyte	0.19
LPCAT1	1.78476e-10	0.4768	0.268	0.084	3.3325e-06	monocyte	0.184
CELF1	1.86175e-10	0.503649	0.443	0.198	3.47627e-06	monocyte	0.245
UBA52	1.93214e-10	0.347809	0.911	0.859	3.60769e-06	monocyte	0.052
HSPH1	1.98188e-10	1.23504	0.516	0.264	3.70056e-06	monocyte	0.252
ELF2	1.98195e-10	0.682238	0.358	0.146	3.7007e-06	monocyte	0.212
FOXN2	2.08497e-10	0.384786	0.358	0.141	3.89305e-06	monocyte	0.217
WASHC4	2.10248e-10	0.622986	0.435	0.203	3.92575e-06	monocyte	0.232
CMIP	2.1047e-10	0.41263	0.443	0.207	3.92989e-06	monocyte	0.236
BNIP2	2.11684e-10	0.452643	0.431	0.2	3.95256e-06	monocyte	0.231
SLC31A2	2.24541e-10	0.451171	0.39	0.166	4.19264e-06	monocyte	0.224
TUT7	2.36545e-10	0.266267	0.447	0.198	4.41676e-06	monocyte	0.249
ACTR2	2.56107e-10	0.428163	0.793	0.508	4.78202e-06	monocyte	0.285
OSBPL8	2.6362e-10	0.57803	0.48	0.235	4.92231e-06	monocyte	0.245
LRCH4	2.64358e-10	0.517775	0.272	0.089	4.9361e-06	monocyte	0.183
CHCHD5	2.74359e-10	0.291968	0.313	0.109	5.12284e-06	monocyte	0.204
PTEN	2.87246e-10	0.532512	0.459	0.219	5.36346e-06	monocyte	0.24
ILF3-DT	3.04333e-10	0.676334	0.264	0.084	5.6825e-06	monocyte	0.18
PRR13	3.0496e-10	0.379071	0.581	0.308	5.69421e-06	monocyte	0.273
PSMB10	3.12842e-10	0.293133	0.337	0.128	5.84138e-06	monocyte	0.209
ERAP2	3.15089e-10	0.500795	0.362	0.157	5.88335e-06	monocyte	0.205
SNX27	3.3287e-10	0.539461	0.35	0.141	6.21535e-06	monocyte	0.209
ADAR	3.33321e-10	0.393789	0.427	0.187	6.22376e-06	monocyte	0.24
ZNF106	3.67381e-10	0.515204	0.524	0.282	6.85974e-06	monocyte	0.242
RHOG	3.74726e-10	0.393749	0.622	0.333	6.99689e-06	monocyte	0.289
FAM49A	3.97093e-10	0.462966	0.305	0.107	7.41452e-06	monocyte	0.198
PHIP	4.34219e-10	0.435013	0.5	0.248	8.10773e-06	monocyte	0.252
BTK	4.35223e-10	0.299162	0.301	0.105	8.12648e-06	monocyte	0.196
EIF1	4.35655e-10	0.379734	0.907	0.891	8.13456e-06	monocyte	0.016
RBM39	4.44414e-10	0.428857	0.829	0.487	8.2981e-06	monocyte	0.342
RABGAP1L	4.46657e-10	0.458387	0.289	0.1	8.33997e-06	monocyte	0.189
FNIP2	4.47849e-10	0.631459	0.382	0.171	8.36224e-06	monocyte	0.211
RPS6KA1	4.66548e-10	0.384722	0.309	0.116	8.71139e-06	monocyte	0.193
LPGAT1	4.99954e-10	0.391373	0.305	0.116	9.33514e-06	monocyte	0.189
SRA1	5.01227e-10	0.371948	0.329	0.128	9.35892e-06	monocyte	0.201
LACTB	5.13329e-10	0.405841	0.325	0.13	9.58487e-06	monocyte	0.195
UBE2L6	5.4885e-10	0.381455	0.354	0.148	1.02481e-05	monocyte	0.206
TAOK1	5.81141e-10	0.51177	0.394	0.173	1.08511e-05	monocyte	0.221
PTGS2	6.37078e-10	1.80165	0.398	0.194	1.18955e-05	monocyte	0.204
QSOX1	6.46664e-10	0.340652	0.309	0.114	1.20745e-05	monocyte	0.195
HNRNPU	6.47741e-10	0.421274	0.833	0.542	1.20946e-05	monocyte	0.291
DGKZ	7.21651e-10	0.472136	0.313	0.118	1.34747e-05	monocyte	0.195
UBR4	7.26377e-10	0.280652	0.333	0.13	1.35629e-05	monocyte	0.203
NMI	8.43136e-10	0.485746	0.272	0.093	1.5743e-05	monocyte	0.179
HSPA1B	8.49125e-10	0.977706	0.585	0.337	1.58549e-05	monocyte	0.248
TMEM167A	8.57034e-10	0.431262	0.394	0.178	1.60025e-05	monocyte	0.216
APOBR	8.61779e-10	0.542615	0.317	0.125	1.60911e-05	monocyte	0.192
TLE4	8.62431e-10	0.426948	0.463	0.228	1.61033e-05	monocyte	0.235
MOB3A	8.80966e-10	0.452879	0.272	0.093	1.64494e-05	monocyte	0.179
CWC25	8.869e-10	0.511604	0.276	0.098	1.65602e-05	monocyte	0.178
ETF1	9.5725e-10	0.635469	0.407	0.187	1.78738e-05	monocyte	0.22
CFLAR	9.71774e-10	0.515965	0.659	0.392	1.8145e-05	monocyte	0.267
ADAM17	9.79069e-10	0.510973	0.39	0.178	1.82812e-05	monocyte	0.212
CCPG1	1.01929e-09	0.55322	0.358	0.155	1.90321e-05	monocyte	0.203
PPP2R5A	1.01955e-09	0.420021	0.26	0.089	1.9037e-05	monocyte	0.171
WTAP	1.02042e-09	0.346916	0.378	0.159	1.90533e-05	monocyte	0.219
ERICH1	1.05941e-09	0.524032	0.435	0.212	1.97813e-05	monocyte	0.223
C11orf58	1.06725e-09	0.495257	0.516	0.273	1.99278e-05	monocyte	0.243
GNS	1.07165e-09	0.432048	0.39	0.173	2.00099e-05	monocyte	0.217
PGAM1	1.07952e-09	0.307389	0.439	0.21	2.01569e-05	monocyte	0.229
ACTR3	1.16879e-09	0.489778	0.663	0.41	2.18237e-05	monocyte	0.253
LSM6	1.18301e-09	0.315679	0.317	0.123	2.20892e-05	monocyte	0.194
PTP4A2	1.23151e-09	0.279394	0.699	0.41	2.29947e-05	monocyte	0.289
NAAA	1.27613e-09	0.336982	0.276	0.096	2.38279e-05	monocyte	0.18
PPM1F	1.31671e-09	0.555856	0.272	0.096	2.45856e-05	monocyte	0.176
YY1	1.36495e-09	0.341216	0.423	0.196	2.54863e-05	monocyte	0.227
DENND3	1.41765e-09	0.873449	0.309	0.123	2.64705e-05	monocyte	0.186
KMT2C	1.56455e-09	0.490692	0.512	0.269	2.92132e-05	monocyte	0.243
ANP32A	2.04429e-09	0.443115	0.5	0.255	3.8171e-05	monocyte	0.245
SRPK2	2.08675e-09	0.446481	0.252	0.084	3.89638e-05	monocyte	0.168
SH3GLB1	2.12861e-09	0.289607	0.476	0.237	3.97454e-05	monocyte	0.239
RNF166	2.63549e-09	0.292782	0.374	0.162	4.92098e-05	monocyte	0.212
CMTM6	2.81817e-09	0.410807	0.569	0.323	5.26209e-05	monocyte	0.246
CITED2	2.94241e-09	0.459867	0.443	0.21	5.49406e-05	monocyte	0.233
ARRB2	2.98468e-09	0.419873	0.642	0.38	5.57299e-05	monocyte	0.262
POLR1D	3.02768e-09	0.251967	0.488	0.253	5.65328e-05	monocyte	0.235
YTHDF3	3.09262e-09	0.55509	0.268	0.098	5.77454e-05	monocyte	0.17
ACOT9	3.12939e-09	0.396447	0.268	0.096	5.8432e-05	monocyte	0.172
NIPBL	3.17695e-09	0.356733	0.524	0.276	5.932e-05	monocyte	0.248
FERMT3	3.18106e-09	0.353469	0.423	0.198	5.93968e-05	monocyte	0.225
DIAPH2	3.2778e-09	0.310884	0.333	0.132	6.1203e-05	monocyte	0.201
HNRNPA3	3.38022e-09	0.456642	0.703	0.462	6.31154e-05	monocyte	0.241
LAT2	3.42909e-09	0.280601	0.402	0.178	6.4028e-05	monocyte	0.224
GABARAPL1	3.50967e-09	0.65282	0.382	0.173	6.55326e-05	monocyte	0.209
YWHAB	3.72572e-09	0.358141	0.74	0.476	6.95666e-05	monocyte	0.264
DEK	3.8616e-09	0.361948	0.61	0.355	7.21038e-05	monocyte	0.255
SKAP2	3.89525e-09	0.283269	0.549	0.301	7.27322e-05	monocyte	0.248
RPS9	4.10752e-09	0.329184	0.911	0.904	7.66955e-05	monocyte	0.007
FOSB	4.41642e-09	0.983637	0.768	0.59	8.24634e-05	monocyte	0.178
PPP1R12A	4.56712e-09	0.433749	0.447	0.219	8.52772e-05	monocyte	0.228
BLOC1S1	4.6236e-09	0.253889	0.598	0.349	8.63319e-05	monocyte	0.249
TUBA1A	5.24467e-09	0.516281	0.459	0.228	9.79284e-05	monocyte	0.231
SECTM1	5.49356e-09	0.451919	0.289	0.109	0.000102576	monocyte	0.18
ASAP1	6.17442e-09	0.47327	0.35	0.153	0.000115289	monocyte	0.197
ARL8B	6.38088e-09	0.39161	0.297	0.116	0.000119144	monocyte	0.181
TMX4	6.95249e-09	0.491594	0.272	0.103	0.000129817	monocyte	0.169
HACD4	7.00856e-09	0.338171	0.35	0.155	0.000130864	monocyte	0.195
DOK2	7.07713e-09	0.302366	0.362	0.155	0.000132144	monocyte	0.207
PSME2	7.1066e-09	0.392457	0.581	0.326	0.000132694	monocyte	0.255
SEPT9	7.18478e-09	0.332569	0.415	0.203	0.000134154	monocyte	0.212
SERINC3	7.25227e-09	0.49484	0.325	0.139	0.000135414	monocyte	0.186
WIPF1	7.29121e-09	0.492693	0.516	0.273	0.000136141	monocyte	0.243
MBNL1	7.56955e-09	0.517242	0.691	0.426	0.000141339	monocyte	0.265
APBB1IP	8.11932e-09	0.333148	0.411	0.187	0.000151604	monocyte	0.224
FCER1G	8.34592e-09	0.339962	0.858	0.647	0.000155835	monocyte	0.211
SYK	8.37567e-09	0.387027	0.508	0.271	0.00015639	monocyte	0.237
CTDSP1	9.27108e-09	0.3331	0.313	0.13	0.00017311	monocyte	0.183
ERBIN	1.13102e-08	0.436229	0.398	0.187	0.000211184	monocyte	0.211
ATG12	1.22524e-08	0.375783	0.301	0.121	0.000228776	monocyte	0.18
RIN3	1.23733e-08	0.35102	0.39	0.182	0.000231034	monocyte	0.208
CREBBP	1.24871e-08	0.47711	0.325	0.141	0.000233159	monocyte	0.184
GGNBP2	1.26691e-08	0.409049	0.39	0.185	0.000236557	monocyte	0.205
DNAJB6	1.27067e-08	0.551286	0.528	0.292	0.000237259	monocyte	0.236
FLI1	1.31905e-08	0.402922	0.341	0.144	0.000246292	monocyte	0.197
JAK1	1.34055e-08	0.406619	0.5	0.282	0.000250308	monocyte	0.218
GIMAP7	1.36158e-08	0.326795	0.423	0.203	0.000254235	monocyte	0.22
ELOVL5	1.37266e-08	0.406619	0.256	0.096	0.000256303	monocyte	0.16
ZNF331	1.38204e-08	1.37207	0.378	0.21	0.000258055	monocyte	0.168
PURB	1.40273e-08	0.465453	0.321	0.144	0.000261917	monocyte	0.177
STAT6	1.46334e-08	0.499831	0.337	0.153	0.000273235	monocyte	0.184
MKRN1	1.50793e-08	0.295786	0.309	0.13	0.00028156	monocyte	0.179
ENO1	1.66474e-08	0.359527	0.663	0.401	0.000310841	monocyte	0.262
STXBP3	1.6902e-08	0.324254	0.301	0.118	0.000315594	monocyte	0.183
JMJD1C	1.71389e-08	0.508188	0.61	0.364	0.000320018	monocyte	0.246
SLU7	1.81096e-08	0.337136	0.289	0.114	0.000338142	monocyte	0.175
PRKCD	1.82117e-08	0.348681	0.285	0.112	0.000340049	monocyte	0.173
PLEKHB2	1.8427e-08	0.327857	0.346	0.153	0.000344069	monocyte	0.193
RNF130	1.86544e-08	0.286141	0.659	0.403	0.000348315	monocyte	0.256
SCIMP	1.90239e-08	0.323873	0.394	0.189	0.000355214	monocyte	0.205
PHC2	1.98796e-08	0.27641	0.309	0.128	0.000371191	monocyte	0.181
SRSF3	2.08585e-08	0.313442	0.736	0.492	0.00038947	monocyte	0.244
CDC40	2.13717e-08	0.359058	0.272	0.105	0.000399052	monocyte	0.167
NBPF14	2.44229e-08	0.441239	0.325	0.146	0.000456024	monocyte	0.179
RAF1	2.69143e-08	0.585887	0.285	0.114	0.000502544	monocyte	0.171
PAFAH1B2	2.72964e-08	0.297028	0.252	0.089	0.000509679	monocyte	0.163
USP48	2.77354e-08	0.360093	0.317	0.13	0.000517875	monocyte	0.187
HK1	2.80931e-08	0.257018	0.313	0.13	0.000524554	monocyte	0.183
ENTPD1	2.8123e-08	0.595819	0.427	0.221	0.000525112	monocyte	0.206
BAZ1A	2.86712e-08	0.44091	0.423	0.21	0.000535349	monocyte	0.213
ATP5F1E	3.14992e-08	0.28359	0.907	0.811	0.000588152	monocyte	0.096
NONO	3.23249e-08	0.260162	0.398	0.198	0.00060357	monocyte	0.2
MCOLN1	3.35821e-08	0.321095	0.354	0.155	0.000627046	monocyte	0.199
PPP1R18	3.44464e-08	0.264173	0.394	0.191	0.000643183	monocyte	0.203
USP10	3.4715e-08	0.318681	0.268	0.105	0.000648198	monocyte	0.163
CCNH	3.59376e-08	0.496152	0.407	0.205	0.000671028	monocyte	0.202
MT2A	3.72207e-08	1.07121	0.557	0.323	0.000694985	monocyte	0.234
IL6R	3.7438e-08	0.464161	0.382	0.191	0.000699043	monocyte	0.191
ITGAX	3.74711e-08	0.514518	0.37	0.175	0.000699661	monocyte	0.195
CD33	3.79044e-08	0.357448	0.346	0.155	0.000707751	monocyte	0.191
TPP1	3.9025e-08	0.319191	0.581	0.33	0.000728676	monocyte	0.251
IQSEC1	3.95023e-08	0.355993	0.293	0.121	0.000737586	monocyte	0.172
KLF2	4.01707e-08	0.349777	0.512	0.262	0.000750067	monocyte	0.25
NPEPPS	4.12646e-08	0.587195	0.285	0.116	0.000770492	monocyte	0.169
SLC3A2	4.31952e-08	0.2748	0.362	0.166	0.000806541	monocyte	0.196
YTHDC1	4.47792e-08	0.376751	0.411	0.207	0.000836117	monocyte	0.204
FAM49B	4.49094e-08	0.314428	0.585	0.339	0.000838549	monocyte	0.246
SOS2	4.60459e-08	0.616931	0.289	0.121	0.000859769	monocyte	0.168
NSD3	5.12405e-08	0.300356	0.374	0.18	0.000956763	monocyte	0.194
GAPDH	5.17147e-08	0.333309	0.846	0.779	0.000965617	monocyte	0.067
SLC6A6	5.19039e-08	0.532991	0.26	0.1	0.000969149	monocyte	0.16
HBP1	5.30091e-08	0.25477	0.297	0.121	0.000989786	monocyte	0.176
VEGFA	5.63459e-08	0.714416	0.39	0.198	0.00105209	monocyte	0.192
RASSF5	5.7587e-08	0.362212	0.293	0.121	0.00107527	monocyte	0.172
AFTPH	5.80838e-08	0.363265	0.313	0.134	0.00108454	monocyte	0.179
PLXNC1	6.2625e-08	0.42932	0.366	0.182	0.00116933	monocyte	0.184
PDCD6IP	7.40937e-08	0.284706	0.382	0.18	0.00138348	monocyte	0.202
WDR26	7.65924e-08	0.51123	0.354	0.162	0.00143013	monocyte	0.192
DDX21	7.67719e-08	0.273591	0.585	0.353	0.00143349	monocyte	0.232
MAPK1	7.90328e-08	0.40026	0.362	0.169	0.0014757	monocyte	0.193
SLC20A1	8.6144e-08	0.639052	0.472	0.264	0.00160848	monocyte	0.208
TBRG1	8.72266e-08	0.353541	0.293	0.125	0.00162869	monocyte	0.168
H2AFY	9.09346e-08	0.284484	0.724	0.451	0.00169793	monocyte	0.273
CCDC88B	9.1821e-08	0.44577	0.341	0.159	0.00171448	monocyte	0.182
UBALD2	1.00362e-07	0.317992	0.305	0.132	0.00187396	monocyte	0.173
ATF3	1.05453e-07	0.533551	0.618	0.41	0.00196902	monocyte	0.208
NCOR1	1.12555e-07	0.320056	0.419	0.221	0.00210163	monocyte	0.198
KIAA1551	1.13964e-07	0.864326	0.472	0.264	0.00212793	monocyte	0.208
PPP1CB	1.14461e-07	0.443731	0.435	0.244	0.00213721	monocyte	0.191
ATP11A	1.16828e-07	0.348439	0.256	0.098	0.00218141	monocyte	0.158
TAPBP	1.26211e-07	0.440041	0.516	0.298	0.00235661	monocyte	0.218
FAM204A	1.31151e-07	0.283511	0.341	0.159	0.00244885	monocyte	0.182
PLSCR1	1.44761e-07	0.33463	0.492	0.287	0.00270297	monocyte	0.205
SLC38A2	1.45839e-07	0.301004	0.553	0.308	0.00272311	monocyte	0.245
EEF2	1.46974e-07	0.272888	0.813	0.61	0.00274429	monocyte	0.203
COPS2	1.50902e-07	0.257613	0.256	0.103	0.00281764	monocyte	0.153
AGFG1	1.59082e-07	0.297441	0.341	0.157	0.00297039	monocyte	0.184
NSMAF	1.73858e-07	0.808533	0.264	0.116	0.00324628	monocyte	0.148
SLC38A10	1.81722e-07	0.395593	0.276	0.121	0.00339312	monocyte	0.155
MLXIP	1.90882e-07	0.260571	0.354	0.166	0.00356414	monocyte	0.188
HLA-A	2.04732e-07	0.261234	0.919	0.724	0.00382275	monocyte	0.195
VAMP2	2.38618e-07	0.39364	0.39	0.203	0.00445548	monocyte	0.187
SPG21	2.64088e-07	0.369747	0.321	0.155	0.00493105	monocyte	0.166
HCLS1	2.97179e-07	0.271659	0.683	0.449	0.00554893	monocyte	0.234
ARAP1	3.01694e-07	0.351311	0.358	0.173	0.00563324	monocyte	0.185
IQGAP2	3.07251e-07	0.287308	0.435	0.241	0.00573699	monocyte	0.194
DOCK5	3.10441e-07	0.483477	0.256	0.109	0.00579656	monocyte	0.147
CSRNP1	3.19397e-07	0.396573	0.289	0.128	0.00596377	monocyte	0.161
TRIM38	3.35616e-07	0.466101	0.39	0.207	0.00626662	monocyte	0.183
HIPK1	3.43117e-07	0.590991	0.272	0.121	0.00640667	monocyte	0.151
2022-03-01	3.47525e-07	0.355131	0.524	0.303	0.00648898	monocyte	0.221
GRB2	3.48535e-07	0.27242	0.683	0.435	0.00650785	monocyte	0.248
EP300	3.98563e-07	0.267832	0.378	0.191	0.00744197	monocyte	0.187
KLF6	4.03796e-07	0.287211	0.837	0.556	0.00753967	monocyte	0.281
MAP3K11	4.0955e-07	0.436871	0.329	0.15	0.00764712	monocyte	0.179
PARP14	4.4883e-07	0.361693	0.423	0.228	0.00838056	monocyte	0.195
PAK1	4.59395e-07	0.315914	0.411	0.21	0.00857782	monocyte	0.201
MAP2K1	4.86396e-07	0.308552	0.28	0.125	0.00908199	monocyte	0.155
SF3B1	5.20759e-07	0.300788	0.614	0.385	0.00972361	monocyte	0.229
SPG11	5.2689e-07	0.303051	0.289	0.13	0.00983809	monocyte	0.159
KAT6A	5.59702e-07	0.346752	0.297	0.132	0.0104508	monocyte	0.165
TRMT1	6.16974e-07	0.260864	0.293	0.132	0.0115201	monocyte	0.161
CR1	6.32745e-07	0.497077	0.285	0.123	0.0118146	monocyte	0.162
CYLD	6.37069e-07	0.442256	0.366	0.189	0.0118954	monocyte	0.177
PTBP3	6.69638e-07	0.367972	0.476	0.271	0.0125035	monocyte	0.205
LEPROTL1	7.41864e-07	0.305419	0.28	0.123	0.0138521	monocyte	0.157
ENY2	7.73221e-07	0.372344	0.524	0.323	0.0144376	monocyte	0.201
CAPZA1	7.73291e-07	0.30342	0.537	0.337	0.0144389	monocyte	0.2
GIMAP8	7.83723e-07	0.27025	0.285	0.128	0.0146337	monocyte	0.157
PLIN3	9.00126e-07	0.322505	0.268	0.116	0.0168072	monocyte	0.152
CEBPD	1.02666e-06	0.357549	0.776	0.538	0.0191699	monocyte	0.238
ADA2	1.10044e-06	0.300929	0.545	0.337	0.0205474	monocyte	0.208
DAPP1	1.43897e-06	0.274924	0.35	0.171	0.0268685	monocyte	0.179
PRMT9	1.47384e-06	0.323274	0.285	0.13	0.0275196	monocyte	0.155
DDX3X	1.49283e-06	0.663003	0.63	0.405	0.0278742	monocyte	0.225
WDR82	1.53676e-06	0.370372	0.317	0.159	0.0286944	monocyte	0.158
MAT2A	1.57705e-06	0.536642	0.463	0.285	0.0294468	monocyte	0.178
KLF7	1.71406e-06	0.457401	0.272	0.123	0.032005	monocyte	0.149
RGS19	1.72685e-06	0.26232	0.382	0.205	0.0322438	monocyte	0.177
ZSWIM6	1.73099e-06	0.271323	0.293	0.137	0.032321	monocyte	0.156
TMEM33	1.74043e-06	0.296339	0.268	0.121	0.0324972	monocyte	0.147
UBQLN1	1.81849e-06	0.46392	0.252	0.109	0.0339549	monocyte	0.143
PCNX1	1.88069e-06	0.552194	0.252	0.114	0.0351163	monocyte	0.138
RB1CC1	1.98289e-06	0.40767	0.321	0.164	0.0370245	monocyte	0.157
RPL7	2.02333e-06	0.253113	0.882	0.836	0.0377796	monocyte	0.046
CRYBG1	2.1452e-06	0.298148	0.28	0.13	0.0400552	monocyte	0.15
TBC1D1	2.17073e-06	0.342742	0.252	0.112	0.0405318	monocyte	0.14
TNFRSF14	2.24778e-06	0.253577	0.439	0.255	0.0419706	monocyte	0.184
SPOP	2.33881e-06	0.251582	0.268	0.121	0.0436703	monocyte	0.147
NAGK	2.40693e-06	0.255354	0.516	0.301	0.0449422	monocyte	0.215
BIRC2	2.42677e-06	0.288192	0.317	0.155	0.0453126	monocyte	0.162
XBP1	2.46922e-06	0.352955	0.402	0.232	0.0461053	monocyte	0.17
SEC14L1	2.62477e-06	0.74274	0.346	0.187	0.0490097	monocyte	0.159
HSPA1A	2.66991e-06	0.638818	0.756	0.604	0.0498525	monocyte	0.152
PHF20	2.78844e-06	0.262111	0.382	0.207	0.0520657	monocyte	0.175
ARHGEF1	2.88122e-06	0.38049	0.272	0.128	0.0537982	monocyte	0.144
LCP2	3.02611e-06	0.36956	0.5	0.303	0.0565036	monocyte	0.197
MIER1	3.55002e-06	0.366103	0.28	0.139	0.0662859	monocyte	0.141
PPP4R3A	3.56103e-06	0.298072	0.37	0.203	0.0664915	monocyte	0.167
MSL1	3.72344e-06	0.457821	0.26	0.121	0.069524	monocyte	0.139
UTRN	3.8235e-06	0.251977	0.467	0.267	0.0713924	monocyte	0.2
DHRS7	4.14527e-06	0.330621	0.386	0.214	0.0774004	monocyte	0.172
GNA13	4.15167e-06	0.434753	0.358	0.198	0.07752	monocyte	0.16
APOL6	4.2354e-06	0.253971	0.337	0.173	0.0790835	monocyte	0.164
DYNC1LI1	4.48737e-06	0.279497	0.276	0.137	0.0837881	monocyte	0.139
EWSR1	4.68183e-06	0.379571	0.394	0.221	0.0874191	monocyte	0.173
XRN1	4.68633e-06	0.353531	0.252	0.116	0.0875031	monocyte	0.136
CD53	4.82683e-06	0.290494	0.598	0.378	0.0901266	monocyte	0.22
ZBTB1	4.83826e-06	0.352963	0.28	0.137	0.09034	monocyte	0.143
SNX17	6.43576e-06	0.351703	0.28	0.144	0.120169	monocyte	0.136
SLC15A3	6.48905e-06	0.287444	0.358	0.196	0.121164	monocyte	0.162
ARHGAP45	6.93325e-06	0.287803	0.402	0.235	0.129458	monocyte	0.167
ETS2	7.04071e-06	0.272754	0.561	0.367	0.131464	monocyte	0.194
SQSTM1	7.10711e-06	0.343248	0.561	0.367	0.132704	monocyte	0.194
RNASEK	7.44832e-06	0.550181	0.252	0.121	0.139075	monocyte	0.131
ADAM10	8.29669e-06	0.411661	0.354	0.2	0.154916	monocyte	0.154
STAT3	8.31464e-06	0.308091	0.484	0.296	0.155251	monocyte	0.188
GIT2	9.05927e-06	0.276339	0.309	0.157	0.169155	monocyte	0.152
PPP2CA	9.69921e-06	0.300746	0.272	0.139	0.181104	monocyte	0.133
EIF4A3	1.0211e-05	0.331735	0.455	0.276	0.19066	monocyte	0.179
SPECC1	1.04073e-05	0.269794	0.264	0.125	0.194324	monocyte	0.139
SPTY2D1	1.0808e-05	0.306378	0.256	0.125	0.201806	monocyte	0.131
ARHGAP9	1.13873e-05	0.30919	0.256	0.123	0.212624	monocyte	0.133
MED13L	1.15295e-05	0.283965	0.374	0.205	0.215278	monocyte	0.169
AFF4	1.26038e-05	0.409187	0.394	0.235	0.235339	monocyte	0.159
SHOC2	1.28748e-05	0.339204	0.285	0.144	0.240398	monocyte	0.141
FLII	1.36683e-05	0.283569	0.293	0.15	0.255214	monocyte	0.143
ATP2B1	1.43073e-05	0.250864	0.472	0.28	0.267145	monocyte	0.192
SPEN	1.51224e-05	0.297976	0.386	0.226	0.282365	monocyte	0.16
COPA	1.53904e-05	0.341156	0.378	0.216	0.287369	monocyte	0.162
TRIM56	1.68635e-05	0.325542	0.26	0.128	0.314875	monocyte	0.132
THBS1	1.77014e-05	0.656063	0.256	0.125	0.330521	monocyte	0.131
ZFP36	1.8484e-05	0.432153	0.805	0.681	0.345133	monocyte	0.124
STK4	1.87889e-05	0.496817	0.545	0.349	0.350826	monocyte	0.196
EIF5	1.91801e-05	0.340026	0.654	0.456	0.35813	monocyte	0.198
TNRC6B	2.15582e-05	0.440616	0.407	0.248	0.402535	monocyte	0.159
TACC1	2.28032e-05	0.303612	0.459	0.285	0.425782	monocyte	0.174
PSMA3-AS1	2.36518e-05	0.386872	0.374	0.219	0.441627	monocyte	0.155
AC020916.1	2.73148e-05	0.527163	0.256	0.132	0.510022	monocyte	0.124
GNAQ	2.84431e-05	0.345065	0.398	0.239	0.531089	monocyte	0.159
IFRD1	2.89266e-05	1.25309	0.459	0.285	0.540118	monocyte	0.174
AREG	2.92609e-05	0.530307	0.321	0.173	0.54636	monocyte	0.148
INTS6	3.19365e-05	0.355398	0.37	0.216	0.596318	monocyte	0.154
SP100	3.27269e-05	0.266765	0.439	0.273	0.611077	monocyte	0.166
RNF13	3.74613e-05	0.253347	0.398	0.235	0.699477	monocyte	0.163
AKNA	3.79057e-05	0.305021	0.289	0.15	0.707776	monocyte	0.139
BAZ2B	4.14481e-05	0.293528	0.463	0.292	0.773919	monocyte	0.171
PPP1R10	4.28129e-05	0.591992	0.476	0.308	0.799403	monocyte	0.168
ARIH1	4.5672e-05	0.281672	0.252	0.13	0.852788	monocyte	0.122
POLR2J3.1	5.09833e-05	0.375432	0.423	0.255	0.95196	monocyte	0.168
SH3BP2	5.34968e-05	0.365065	0.341	0.198	0.998892	monocyte	0.143
NSD1	5.44262e-05	0.313919	0.333	0.194	1	monocyte	0.139
MED13	6.00649e-05	0.344183	0.264	0.139	1	monocyte	0.125
RSBN1L	6.05037e-05	0.327447	0.272	0.144	1	monocyte	0.128
ADCY7	7.52845e-05	0.255734	0.256	0.132	1	monocyte	0.124
CXCL2	7.58827e-05	0.446224	0.354	0.212	1	monocyte	0.142
LCOR	7.93109e-05	0.265916	0.28	0.155	1	monocyte	0.125
GPBP1	8.03018e-05	0.37496	0.411	0.26	1	monocyte	0.151
ICAM1	8.07178e-05	0.331781	0.321	0.182	1	monocyte	0.139
BIRC6	8.17359e-05	0.430823	0.289	0.159	1	monocyte	0.13
HIF1A	8.40375e-05	0.262958	0.443	0.282	1	monocyte	0.161
SPAG9	8.44445e-05	0.312704	0.443	0.28	1	monocyte	0.163
DCP2	8.67965e-05	0.272991	0.313	0.175	1	monocyte	0.138
KDM2A	8.90461e-05	0.279053	0.297	0.164	1	monocyte	0.133
INPP5D	9.43358e-05	0.409547	0.358	0.214	1	monocyte	0.144
ANXA11	9.71208e-05	0.264186	0.435	0.273	1	monocyte	0.162
MBP	0.000104383	0.422705	0.439	0.276	1	monocyte	0.163
ARID4B	0.000105214	0.283278	0.366	0.221	1	monocyte	0.145
ACSL4	0.000114366	0.311082	0.268	0.146	1	monocyte	0.122
ADPGK	0.000121708	0.313965	0.362	0.221	1	monocyte	0.141
NR3C1	0.000126272	0.283527	0.394	0.246	1	monocyte	0.148
HOOK3	0.000196136	0.277038	0.346	0.212	1	monocyte	0.134
SMG1	0.000202387	0.316773	0.289	0.164	1	monocyte	0.125
SLC16A3	0.000208706	0.351482	0.309	0.185	1	monocyte	0.124
NABP1	0.000211393	1.09609	0.545	0.374	1	monocyte	0.171
CARD8	0.000225509	0.3274	0.321	0.194	1	monocyte	0.127
KDM5A	0.000229088	0.348734	0.37	0.232	1	monocyte	0.138
UBE2G2	0.000300985	0.342643	0.276	0.162	1	monocyte	0.114
FNIP1	0.000436236	0.347269	0.301	0.175	1	monocyte	0.126
BOD1L1	0.000462503	0.351356	0.455	0.305	1	monocyte	0.15
PTGER4	0.000588574	0.412562	0.329	0.21	1	monocyte	0.119
USP4	0.000596632	0.379061	0.272	0.164	1	monocyte	0.108
TLE3	0.000641857	0.549181	0.289	0.178	1	monocyte	0.111
SMAD2	0.000649396	0.285983	0.268	0.155	1	monocyte	0.113
SBF2	0.000928193	0.263436	0.26	0.15	1	monocyte	0.11
MAP3K8	0.00129333	0.275448	0.333	0.212	1	monocyte	0.121
RSRP1	0.00159587	0.297563	0.524	0.385	1	monocyte	0.139
FUS	0.00183583	0.266706	0.634	0.431	1	monocyte	0.203
CHD2	0.00199111	0.511126	0.35	0.241	1	monocyte	0.109
PSTPIP2	0.00219657	0.274663	0.268	0.164	1	monocyte	0.104
MDM4	0.00242281	0.267778	0.407	0.278	1	monocyte	0.129
BLOC1S6	0.00280531	0.401594	0.317	0.216	1	monocyte	0.101
GLUL	0.00320918	0.466739	0.675	0.494	1	monocyte	0.181
N4BP2L2	0.00323042	0.374895	0.537	0.39	1	monocyte	0.147
CYTH4	0.00413253	0.296782	0.341	0.232	1	monocyte	0.109
TMF1	0.0052965	0.25652	0.256	0.166	1	monocyte	0.09
CDK13	0.0073063	0.268617	0.285	0.189	1	monocyte	0.096

## Sheet: Decentric
gene	p_val	avg_log2FC	pct.1	pct.2	p_val_adj	cluster	pct.diff
CD207	1.09999e-54	2.59643	0.409	0.003	2.05391e-50	decentric	0.406
CD1C	5.22737e-51	2.24287	0.5	0.021	9.76054e-47	decentric	0.479
CD1E	2.6264e-41	1.83708	0.424	0.019	4.90402e-37	decentric	0.405
PKIB	1.11559e-31	2.16402	0.47	0.048	2.08303e-27	decentric	0.422
HLA-DQA1	2.78584e-31	2.55065	0.909	0.384	5.20172e-27	decentric	0.525
PPP1R14A	2.68349e-30	0.888578	0.288	0.01	5.01062e-26	decentric	0.278
FCER1A	1.10969e-29	2.57376	0.606	0.108	2.07202e-25	decentric	0.498
HLA-DQB1	2.79706e-29	2.49621	0.939	0.553	5.22267e-25	decentric	0.386
CST7	3.94578e-28	1.11903	0.333	0.021	7.36757e-24	decentric	0.312
SLC38A1	5.15534e-27	0.939157	0.318	0.019	9.62605e-23	decentric	0.299
HLA-DRB11	3.89354e-25	2.12659	0.97	0.703	7.27001e-21	decentric	0.267
HLA-DQB2	4.00563e-25	0.93383	0.258	0.011	7.47932e-21	decentric	0.247
HLA-DPB11	2.66797e-24	2.02929	0.955	0.664	4.98163e-20	decentric	0.291
DNASE1L3	4.71459e-23	2.1537	0.348	0.036	8.80308e-19	decentric	0.312
HLA-DRA1	2.28995e-22	1.71702	0.985	0.822	4.27579e-18	decentric	0.163
HLA-DPA11	2.06034e-21	1.63317	0.97	0.714	3.84707e-17	decentric	0.256
CST31	4.83035e-21	1.72543	0.955	0.884	9.01924e-17	decentric	0.071
CD741	9.65544e-21	1.36948	1	0.851	1.80286e-16	decentric	0.149
TMSB101	4.52231e-20	1.20092	0.985	0.895	8.44406e-16	decentric	0.09
HIC1	8.21202e-20	0.918058	0.333	0.039	1.53335e-15	decentric	0.294
ADAM19	9.3908e-19	1.07264	0.273	0.026	1.75345e-14	decentric	0.247
NDRG2	2.02441e-18	1.09972	0.394	0.063	3.77998e-14	decentric	0.331
PPA1	2.69842e-17	1.75059	0.606	0.187	5.03849e-13	decentric	0.419
RPL37	8.1321e-17	0.839017	1	0.939	1.51843e-12	decentric	0.061
LTB	3.00855e-16	1.40772	0.364	0.063	5.61757e-12	decentric	0.301
RPS19	7.71904e-16	0.977681	1	0.914	1.4413e-11	decentric	0.086
TMSB4X	1.03474e-15	1.17617	0.97	0.927	1.93207e-11	decentric	0.043
CLEC10A	1.05847e-15	1.81574	0.606	0.212	1.97638e-11	decentric	0.394
NAP1L1	1.23444e-15	1.83934	0.788	0.538	2.30494e-11	decentric	0.25
RPS23	2.33807e-15	1.06659	0.97	0.906	4.36564e-11	decentric	0.064
AL136987.1	3.40139e-15	1.02552	0.364	0.065	6.35108e-11	decentric	0.299
STK17A	7.91078e-15	0.84389	0.348	0.065	1.4771e-10	decentric	0.283
MZT2A	1.3306e-13	0.987207	0.424	0.102	2.4845e-09	decentric	0.322
RPL14	2.8308e-13	0.777364	1	0.887	5.28568e-09	decentric	0.113
ACTB1	4.46884e-13	1.05731	0.985	0.905	8.34422e-09	decentric	0.08
ADAM8	1.0073e-11	0.92541	0.364	0.086	1.88083e-07	decentric	0.278
RPS3A	1.60179e-11	0.811529	0.985	0.924	2.99085e-07	decentric	0.061
RPL29	1.74926e-11	0.720785	1	0.897	3.26622e-07	decentric	0.103
LSP11	1.16878e-10	1.31687	0.697	0.378	2.18235e-06	decentric	0.319
RPLP2	1.91177e-10	0.613484	1	0.922	3.56965e-06	decentric	0.078
RPL351	2.63871e-10	0.677806	0.985	0.88	4.927e-06	decentric	0.105
RPS181	2.74569e-10	0.748737	0.985	0.952	5.12675e-06	decentric	0.033
SLAMF7	2.94305e-10	0.867916	0.288	0.061	5.49526e-06	decentric	0.227
RPL6	3.18082e-10	0.680972	0.955	0.9	5.93922e-06	decentric	0.055
RPL32	3.76497e-10	0.75456	0.97	0.937	7.02995e-06	decentric	0.033
PTMS1	4.00605e-10	0.742403	0.545	0.204	7.48009e-06	decentric	0.341
C15orf48	4.04602e-10	0.911651	0.273	0.057	7.55473e-06	decentric	0.216
RGS11	4.54801e-10	1.31099	0.621	0.289	8.49205e-06	decentric	0.332
RPL13	6.8142e-10	0.577866	1	0.961	1.27235e-05	decentric	0.039
RPL4	8.30036e-10	0.774371	0.894	0.748	1.54984e-05	decentric	0.146
PTMA	1.17146e-09	0.649037	0.985	0.913	2.18735e-05	decentric	0.072
RPS29	1.46782e-09	0.887049	0.955	0.895	2.74072e-05	decentric	0.06
CDK2AP2	1.55721e-09	0.731219	0.364	0.102	2.90761e-05	decentric	0.262
HLA-DMA1	2.01208e-09	0.892161	0.833	0.517	3.75696e-05	decentric	0.316
RPS12	2.13932e-09	0.730187	0.97	0.931	3.99454e-05	decentric	0.039
RPS15A	2.50098e-09	0.762934	0.97	0.903	4.66983e-05	decentric	0.067
ACTG1	2.56652e-09	0.753134	0.97	0.822	4.7922e-05	decentric	0.148
CCNB1IP1	3.00023e-09	0.281477	0.258	0.052	5.60203e-05	decentric	0.206
PLD4	3.76804e-09	0.886659	0.364	0.105	7.03569e-05	decentric	0.259
RUNX3	4.1541e-09	1.29182	0.439	0.153	7.75653e-05	decentric	0.286
LGALS21	5.8047e-09	1.53377	0.576	0.267	0.000108385	decentric	0.309
RPL19	6.03728e-09	0.628705	0.955	0.932	0.000112728	decentric	0.023
RHOC	6.53768e-09	0.620194	0.303	0.076	0.000122072	decentric	0.227
RPS24	6.75821e-09	0.731889	0.97	0.939	0.000126189	decentric	0.031
RGS101	6.98528e-09	1.12803	0.727	0.422	0.000130429	decentric	0.305
RPS61	7.6084e-09	0.498365	1	0.948	0.000142064	decentric	0.052
HLA-DOA	7.88676e-09	0.468056	0.409	0.123	0.000147262	decentric	0.286
RPL18A	9.86861e-09	0.745769	0.97	0.908	0.000184267	decentric	0.062
RPL27A	1.06688e-08	0.692796	0.955	0.889	0.000199208	decentric	0.066
RPS27	1.24414e-08	0.694123	1	0.931	0.000232306	decentric	0.069
RPS11	1.3931e-08	0.676657	0.97	0.887	0.000260119	decentric	0.083
HPS5	1.50758e-08	0.662428	0.379	0.12	0.000281495	decentric	0.259
RPS25	2.43898e-08	0.649483	0.955	0.872	0.000455406	decentric	0.083
SERPINB9	2.69454e-08	1.17408	0.47	0.199	0.000503124	decentric	0.271
RPS21	3.19548e-08	0.730383	0.924	0.816	0.00059666	decentric	0.108
PLAC8	3.51458e-08	1.1887	0.318	0.099	0.000656242	decentric	0.219
SINHCAF	3.96596e-08	0.486539	0.318	0.089	0.000740524	decentric	0.229
RPL38	4.15173e-08	0.703512	0.955	0.869	0.000775211	decentric	0.086
RPL10	4.8358e-08	0.690154	1	0.948	0.00090294	decentric	0.052
RPL39	5.56508e-08	0.538066	0.955	0.922	0.00103911	decentric	0.033
RPL34	6.73692e-08	0.562157	0.955	0.952	0.00125792	decentric	0.003
DAPP11	7.20191e-08	0.954161	0.485	0.208	0.00134474	decentric	0.277
BASP11	8.56643e-08	0.593645	0.652	0.302	0.00159952	decentric	0.35
RPS7	1.11085e-07	0.733115	0.97	0.869	0.00207417	decentric	0.101
RPL26	1.35409e-07	0.596105	0.97	0.918	0.00252836	decentric	0.052
RPL15	1.36277e-07	0.655197	0.97	0.908	0.00254457	decentric	0.062
RPL28	1.41694e-07	0.557772	0.97	0.968	0.0026457	decentric	0.002
RPS14	1.5983e-07	0.644154	1	0.937	0.00298435	decentric	0.063
FILIP1L	1.82302e-07	0.673979	0.273	0.073	0.00340394	decentric	0.2
EEF1B2	1.87613e-07	1.00638	0.803	0.719	0.00350312	decentric	0.084
NBDY	2.11096e-07	0.7193	0.348	0.115	0.00394158	decentric	0.233
METRNL	2.13776e-07	1.11314	0.561	0.263	0.00399163	decentric	0.298
RPS2	2.26127e-07	0.636417	0.985	0.916	0.00422224	decentric	0.069
CCDC6	2.88572e-07	0.296858	0.333	0.102	0.00538822	decentric	0.231
RPL9	3.27208e-07	0.535713	0.97	0.877	0.00610963	decentric	0.093
SPINT21	3.56806e-07	0.773178	0.53	0.229	0.00666229	decentric	0.301
RPL7A	3.9872e-07	0.646384	0.939	0.9	0.00744491	decentric	0.039
AHI1	4.09857e-07	0.323433	0.258	0.068	0.00765286	decentric	0.19
GPAT3	5.09628e-07	0.685562	0.288	0.087	0.00951577	decentric	0.201
FCGR2B	5.84709e-07	1.56937	0.409	0.165	0.0109177	decentric	0.244
RPS5	7.70936e-07	0.660348	0.909	0.775	0.0143949	decentric	0.134
FAU	7.83097e-07	0.594113	0.97	0.872	0.014622	decentric	0.098
RPL31	9.52872e-07	0.583121	0.909	0.801	0.017792	decentric	0.108
YWHAH	1.0513e-06	1.01669	0.576	0.294	0.0196298	decentric	0.282
CFL1	1.11747e-06	0.783158	0.848	0.729	0.0208654	decentric	0.119
RPL36A	1.15645e-06	0.642574	0.864	0.711	0.0215932	decentric	0.153
RPS15	1.29413e-06	0.496088	0.955	0.913	0.024164	decentric	0.042
CCND1	1.3991e-06	0.742744	0.303	0.097	0.0261241	decentric	0.206
RPL5	1.42776e-06	0.438594	0.955	0.88	0.0266592	decentric	0.075
RPL12	1.52094e-06	0.586342	0.939	0.898	0.0283991	decentric	0.041
MYL12A	1.67818e-06	0.852279	0.788	0.574	0.031335	decentric	0.214
SERF2	1.90473e-06	0.562387	0.97	0.83	0.0355651	decentric	0.14
SNHG15	2.06126e-06	0.614886	0.333	0.116	0.0384878	decentric	0.217
PTRHD1	2.99195e-06	0.60894	0.409	0.171	0.0558658	decentric	0.238
SEPT6	3.56214e-06	0.487884	0.348	0.129	0.0665123	decentric	0.219
CLTB	3.73761e-06	0.644182	0.379	0.158	0.0697887	decentric	0.221
RPL37A	3.7938e-06	0.569537	0.985	0.918	0.0708378	decentric	0.067
RPS16	4.38171e-06	0.560379	1	0.882	0.0818153	decentric	0.118
AREG1	4.42131e-06	1.1174	0.439	0.204	0.0825548	decentric	0.235
GABARAPL2	4.76689e-06	0.747172	0.485	0.225	0.0890074	decentric	0.26
RPL11	4.9785e-06	0.493563	0.985	0.947	0.0929585	decentric	0.038
UVRAG	5.5157e-06	0.363206	0.394	0.155	0.102989	decentric	0.239
MZT2B	5.88384e-06	0.613085	0.561	0.296	0.109863	decentric	0.265
TMEM14C	6.21882e-06	0.890161	0.515	0.273	0.116118	decentric	0.242
CPNE3	7.09458e-06	0.832849	0.348	0.144	0.13247	decentric	0.204
PFN1	7.59183e-06	0.833395	0.803	0.685	0.141755	decentric	0.118
C1orf54	9.44331e-06	1.05529	0.273	0.097	0.176325	decentric	0.176
CALHM6	1.00009e-05	0.908828	0.455	0.239	0.186736	decentric	0.216
TNF	1.15631e-05	1.06289	0.348	0.142	0.215907	decentric	0.206
DNAJC4	1.176e-05	0.775999	0.394	0.181	0.219583	decentric	0.213
ITM2C	1.21483e-05	0.426805	0.303	0.107	0.226834	decentric	0.196
PDP1	1.47997e-05	0.466069	0.303	0.111	0.276339	decentric	0.192
RPL33	1.59364e-05	0.376174	0.985	0.897	0.297565	decentric	0.088
HMGN1	1.66676e-05	0.51338	0.606	0.344	0.311218	decentric	0.262
RPS8	1.71976e-05	0.568035	0.97	0.927	0.321113	decentric	0.043
FAM162A	1.86273e-05	0.440388	0.394	0.168	0.347809	decentric	0.226
AL355075.4	2.56086e-05	0.28693	0.303	0.113	0.478163	decentric	0.19
RGCC	3.23212e-05	0.484304	0.303	0.116	0.603501	decentric	0.187
CDV3	3.50664e-05	0.729696	0.636	0.367	0.65476	decentric	0.269
RPL27	4.68697e-05	0.625525	0.939	0.784	0.875151	decentric	0.155
RPL24	4.70872e-05	0.466106	0.924	0.851	0.879212	decentric	0.073
LAGE3	5.11888e-05	0.371357	0.258	0.09	0.955797	decentric	0.168
SFT2D2	5.43153e-05	0.572997	0.379	0.176	1	decentric	0.203
RPS4X1	6.47028e-05	0.5251	0.909	0.903	1	decentric	0.006
FAM89B	6.62424e-05	0.816355	0.288	0.12	1	decentric	0.168
GRASP	7.22931e-05	0.604552	0.288	0.115	1	decentric	0.173
SPN	7.98557e-05	0.428417	0.303	0.128	1	decentric	0.175
CIB1	8.41232e-05	0.685668	0.53	0.325	1	decentric	0.205
BIN1	8.47581e-05	0.535158	0.273	0.103	1	decentric	0.17
RPS3	8.58994e-05	0.561035	0.97	0.869	1	decentric	0.101
RNASE6	8.64332e-05	0.669209	0.667	0.422	1	decentric	0.245
SUB1	8.78416e-05	0.718283	0.667	0.475	1	decentric	0.192
PAK11	8.82288e-05	0.588323	0.47	0.262	1	decentric	0.208
GPR160	8.84754e-05	1.06054	0.258	0.095	1	decentric	0.163
CIITA	9.09977e-05	0.487068	0.5	0.252	1	decentric	0.248
IFT20	9.38209e-05	0.68007	0.318	0.136	1	decentric	0.182
NPM1	0.000104275	0.653134	0.803	0.622	1	decentric	0.181
LRRK1	0.000121645	0.267067	0.273	0.105	1	decentric	0.168
MLF2	0.000124922	0.618511	0.394	0.179	1	decentric	0.215
NUDT1	0.000144631	0.511296	0.258	0.1	1	decentric	0.158
AP2S1	0.000156051	0.59094	0.682	0.457	1	decentric	0.225
MIR181A1HG	0.000162077	0.473987	0.258	0.1	1	decentric	0.158
CSF2RA	0.000181637	0.652708	0.455	0.237	1	decentric	0.218
ARL4C1	0.00022694	0.495415	0.561	0.31	1	decentric	0.251
IDH2	0.000227998	0.386489	0.318	0.139	1	decentric	0.179
GPR183	0.00023024	0.813406	0.455	0.257	1	decentric	0.198
DUSP5	0.00023174	0.271333	0.333	0.147	1	decentric	0.186
SIGLEC10	0.000240096	0.358742	0.258	0.099	1	decentric	0.159
CYTOR	0.000241357	0.807147	0.348	0.168	1	decentric	0.18
COTL11	0.000251641	0.503488	0.833	0.557	1	decentric	0.276
AC004687.1	0.000252097	0.720544	0.394	0.216	1	decentric	0.178
RPL36	0.000256239	0.451429	0.894	0.88	1	decentric	0.014
JPT1	0.000257449	0.464665	0.515	0.291	1	decentric	0.224
BUD23	0.000268159	0.311005	0.273	0.108	1	decentric	0.165
RPL8	0.000279134	0.374904	0.939	0.9	1	decentric	0.039
CNN2	0.000284256	0.500275	0.47	0.257	1	decentric	0.213
TPT11	0.000329702	0.266014	1	0.977	1	decentric	0.023
RPSA	0.000411723	0.470724	0.879	0.735	1	decentric	0.144
MRPL55	0.000414339	0.269837	0.303	0.132	1	decentric	0.171
TCOF1	0.000441316	0.345726	0.333	0.157	1	decentric	0.176
PPHLN1	0.000444184	0.358859	0.348	0.163	1	decentric	0.185
COMMD6	0.000470432	0.780971	0.652	0.498	1	decentric	0.154
DNAJC15	0.000503463	0.767861	0.439	0.246	1	decentric	0.193
SMCO4	0.000517853	0.417393	0.288	0.126	1	decentric	0.162
PRMT1	0.000526243	0.289535	0.273	0.116	1	decentric	0.157
RPL13A	0.000570316	0.371931	0.97	0.916	1	decentric	0.054
HINT1	0.00057623	0.550004	0.636	0.444	1	decentric	0.192
MRPL47	0.000581259	0.354655	0.273	0.111	1	decentric	0.162
ATP5F1E1	0.000600829	0.547702	0.909	0.838	1	decentric	0.071
TBC1D9	0.000644734	0.305647	0.348	0.168	1	decentric	0.18
HAVCR2	0.000669567	0.401285	0.379	0.192	1	decentric	0.187
TMEM107	0.000680796	0.63475	0.333	0.162	1	decentric	0.171
RPL23A	0.000766784	0.536278	0.939	0.876	1	decentric	0.063
OSBPL81	0.00076916	0.437275	0.53	0.3	1	decentric	0.23
CPVL	0.000789371	0.838375	0.621	0.48	1	decentric	0.141
SNRPG	0.000822348	0.593646	0.485	0.284	1	decentric	0.201
SCIMP1	0.000863675	0.486573	0.439	0.244	1	decentric	0.195
RPS27A	0.000970247	0.490406	0.924	0.903	1	decentric	0.021
CD86	0.000981844	0.811334	0.455	0.292	1	decentric	0.163
C12orf45	0.00101857	0.285626	0.273	0.116	1	decentric	0.157
C8orf59	0.00102792	0.599722	0.515	0.297	1	decentric	0.218
DRAP1	0.00108321	0.677486	0.5	0.31	1	decentric	0.19
ARPC3	0.00111954	0.582545	0.788	0.701	1	decentric	0.087
SYNGR2	0.00118798	0.478555	0.455	0.262	1	decentric	0.193
GTF3C6	0.00118845	0.53353	0.288	0.139	1	decentric	0.149
TAF10	0.0012035	0.604998	0.409	0.231	1	decentric	0.178
RPL30	0.00125438	0.401706	0.97	0.924	1	decentric	0.046
EIF5A	0.00126067	0.646091	0.455	0.265	1	decentric	0.19
VIM1	0.0014166	0.400907	0.818	0.607	1	decentric	0.211
ETV3	0.00144596	0.691698	0.258	0.116	1	decentric	0.142
MED29	0.00149564	0.42799	0.303	0.147	1	decentric	0.156
BCL2	0.0015493	0.355369	0.273	0.124	1	decentric	0.149
RPL35A	0.00168985	0.33033	0.939	0.88	1	decentric	0.059
AXL	0.00191745	0.503238	0.288	0.142	1	decentric	0.146
COX6C	0.00197354	0.328785	0.652	0.491	1	decentric	0.161
DCXR	0.00201593	0.26164	0.258	0.116	1	decentric	0.142
IL181	0.0020842	0.570188	0.409	0.247	1	decentric	0.162
RPS20	0.00210542	0.300866	0.909	0.821	1	decentric	0.088
RPL41	0.00214539	0.355418	0.985	0.958	1	decentric	0.027
GPRIN3	0.00214961	0.29686	0.303	0.149	1	decentric	0.154
UBL5	0.00217765	0.54271	0.667	0.514	1	decentric	0.153
SKIL	0.00221903	0.368949	0.439	0.257	1	decentric	0.182
HMGN2	0.0023485	0.610122	0.682	0.473	1	decentric	0.209
ARHGDIB	0.00235444	0.58523	0.742	0.578	1	decentric	0.164
COPB1	0.00239585	0.398164	0.273	0.134	1	decentric	0.139
NSA2	0.00250232	0.603314	0.621	0.46	1	decentric	0.161
CCL4L21	0.00273173	1.18466	0.439	0.27	1	decentric	0.169
DNAJC8	0.0027689	0.707907	0.455	0.273	1	decentric	0.182
ABI3	0.00279354	0.339549	0.303	0.157	1	decentric	0.146
DBI	0.00302004	0.660815	0.606	0.491	1	decentric	0.115
MAFF	0.00332764	0.270332	0.394	0.226	1	decentric	0.168
SMC5	0.00334703	0.415731	0.273	0.132	1	decentric	0.141
SNRPF	0.00358246	0.347489	0.439	0.26	1	decentric	0.179
RBPJ	0.00363526	0.570164	0.53	0.363	1	decentric	0.167
PRCP	0.0036633	0.518009	0.409	0.236	1	decentric	0.173
MT-ND6	0.00367253	0.343596	0.288	0.139	1	decentric	0.149
RPL22	0.00387408	0.326365	0.894	0.858	1	decentric	0.036
C1orf1621	0.00396533	0.552694	0.621	0.46	1	decentric	0.161
LY86	0.00417852	0.378443	0.53	0.344	1	decentric	0.186
CCL4	0.00422579	0.780194	0.455	0.304	1	decentric	0.151
ERCC1	0.00453849	0.641529	0.288	0.153	1	decentric	0.135
MAGOH	0.00454139	0.349473	0.303	0.155	1	decentric	0.148
REST	0.00462762	0.376179	0.303	0.155	1	decentric	0.148
BCL2A11	0.00466607	0.400803	0.5	0.325	1	decentric	0.175
REV3L	0.00477594	0.384178	0.273	0.136	1	decentric	0.137
VKORC1	0.00488153	0.362903	0.288	0.145	1	decentric	0.143
RPS13	0.00511549	0.376622	0.939	0.882	1	decentric	0.057
CBX3	0.00525319	0.620339	0.5	0.326	1	decentric	0.174
ATP5MC1	0.00557574	0.410572	0.394	0.244	1	decentric	0.15
RPL18	0.00558093	0.278154	0.894	0.905	1	decentric	-0.011
RPLP1	0.00588985	0.264414	1	0.977	1	decentric	0.023
RTF2	0.00590321	0.547221	0.364	0.208	1	decentric	0.156
RPL10A	0.00592886	0.492199	0.879	0.835	1	decentric	0.044
UBA521	0.00593285	0.370976	0.924	0.872	1	decentric	0.052
HLA-DMB	0.00612801	0.478958	0.621	0.47	1	decentric	0.151
DUSP2	0.0062985	0.32691	0.455	0.291	1	decentric	0.164
PA2G4	0.00696636	0.290351	0.485	0.302	1	decentric	0.183
KCNK6	0.0069848	0.428192	0.303	0.171	1	decentric	0.132
ITGAX1	0.00705988	0.35269	0.379	0.231	1	decentric	0.148
GDI21	0.00729636	0.614306	0.591	0.449	1	decentric	0.142
SEC61B	0.00752382	0.542726	0.591	0.426	1	decentric	0.165
FLOT1	0.0076604	0.343983	0.348	0.194	1	decentric	0.154
ATP5MG	0.0080543	0.399853	0.818	0.704	1	decentric	0.114
DBNL	0.00810759	0.510674	0.439	0.283	1	decentric	0.156
MRPS15	0.00834392	0.300363	0.273	0.145	1	decentric	0.128
RACK1	0.00843267	0.321125	0.909	0.853	1	decentric	0.056
ACTR31	0.00861494	0.327795	0.667	0.483	1	decentric	0.184
COX7C	0.00863823	0.318085	0.773	0.672	1	decentric	0.101
NCOA7	0.00880219	0.530359	0.318	0.184	1	decentric	0.134
RTRAF	0.00912506	0.330929	0.455	0.299	1	decentric	0.156
TOMM7	0.0091919	0.558052	0.682	0.62	1	decentric	0.062
SUMO3	0.00921314	0.33428	0.409	0.244	1	decentric	0.165
NCL	0.00928234	0.298928	0.667	0.499	1	decentric	0.168
PRRC2A	0.00939704	0.31299	0.303	0.16	1	decentric	0.143
TAGLN2	0.00946449	0.290495	0.606	0.414	1	decentric	0.192
COX5A	0.00967184	0.534824	0.53	0.341	1	decentric	0.189
BCL2L11	0.00976548	0.357654	0.258	0.137	1	decentric	0.121
CDC37	0.00979422	0.265915	0.439	0.284	1	decentric	0.155
